# Supplementary material
Source: PubMed Central journal article supplement (PMC3136118)
Supplement: NIHMS297791-supplement-01.pdf [file NIHMS297791-supplement-01.pdf]

**Neuron, Volume 70**

**Supplemental Information**

## **Neurexin-Neuroigin Transsynaptic Interaction**

### **Mediates Learning-Related Synaptic Remodeling**

### **and Long-Term Facilitation in *Aplysia***

**Yun-Beom Choi, Hsiu-Ling Li, Stefan R. Kassabov, Iksung Jin,  
Sathyanarayanan V. Puthanveettil, Kevin A. Karl, Yang Lu, Joung-Hun Kim,  
Craig H. Bailey, and Eric R. Kandel**

#### **Supplemental Figures**

#### **Figure S1. Sequence Analysis of ApNRX and ApNLG Including Alternative Splicing Features of ApNRX, Related to Figure 1 and Figure 2**

(A and B) Phylogenetic analysis of *Aplysia*, human, *Drosophila*, and *C.elegans* neuroigin (NLG) and neurexin (NRX) protein sequences. The phylogenetic trees were generated using MEGA4 software (Tamura et al, 2007) and represent evolutionary distances of neuroigin or neurexin homologs as the number of amino acid substitution per site.

(C and D) Sequence alignments of neuroigin and neurexin among different species by Clustalw. ApNLG and ApNRX are highlighted in red.

(E) Alternative splicing features of ApNRX. The amino acid sequence of ApNRX and human neurexin-1 $\alpha$  (NP\_004792.1) were aligned using ClustalW. Positions of the 4 splice sites of ApNRX and 5 splice sites of human neurexin-1 $\alpha$  are indicated with numbers above or below their respective sequences. At splice sites where selected splice inserts are included in the sequence, the inserts are boxed with a solid line. Positions of splice sites where inserts are not included in

the sequence are indicated with arrowheads. The positions and insert sequences of human neurexin-1 $\alpha$  splice sites were extracted from Missler et al, (1998).

Neurexin structural features are depicted as follows: LNS(A) domain – light blue; LNS(B) domain – yellow; PDZ domain – green; transmembrane domain – orange. The LNS domains were obtained using the Conserved Domain Database (CDD) tool at NCBI and transmembrane domains determined with the TMHM topology prediction tool.

In ApNRX, as in vertebrate neurexins, one splice site occurs in each of the three LNS(B) domains. The positions of two of the *Aplysia* splice sites (sites 1 and 3) match exactly the positions of the respective sites in human neurexin-1 $\alpha$  (sites 2 and 4) in the first and third LNS(B) domains. The other two ApNRX splice sites (sites 2 and 4) occur in regions of much lower conservation between the *Aplysia* and vertebrate sequence – the C-terminal half of the second LNS(B) domain, and the region between the last LNS(B) domain and the transmembrane domain. The position of these two sites is close, but not as precisely matching as compared to the equivalent vertebrate positions (sites 3 and 5). Nevertheless, they are in the same domain regions and could be functionally equivalent. The similarity of the alternative splicing of *Aplysia* and vertebrate neurexins extends to the pattern and type of inserts utilized at the equivalent splice sites (Table S1, Missler et al, 1998). Specifically, the splicing pattern at the sites within the LNS(B) domains is simple consisting of a single short insert for both ApNRX (sites 1-3) and vertebrate neurexins (sites 2-4). In contrast, the splicing at site 4

in ApNRX and the equivalent site 5 in vertebrate neurexins utilize multiple and often long inserts.

### A. Phylogenetic Tree of NLG

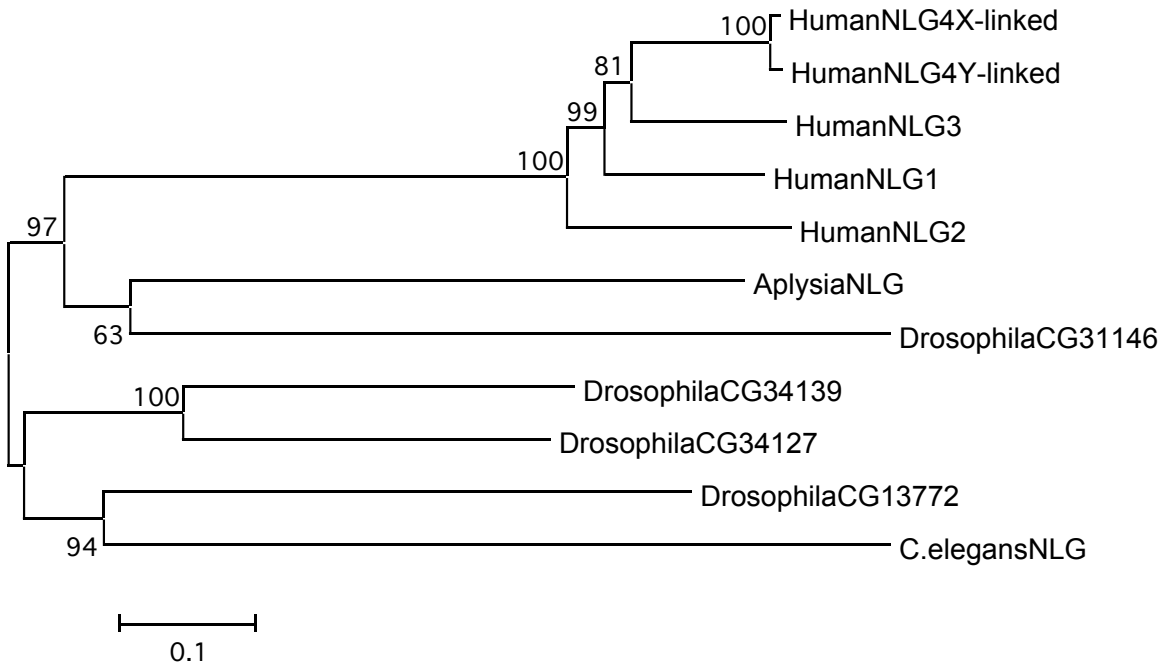

### B. Phylogenetic Tree of NRX

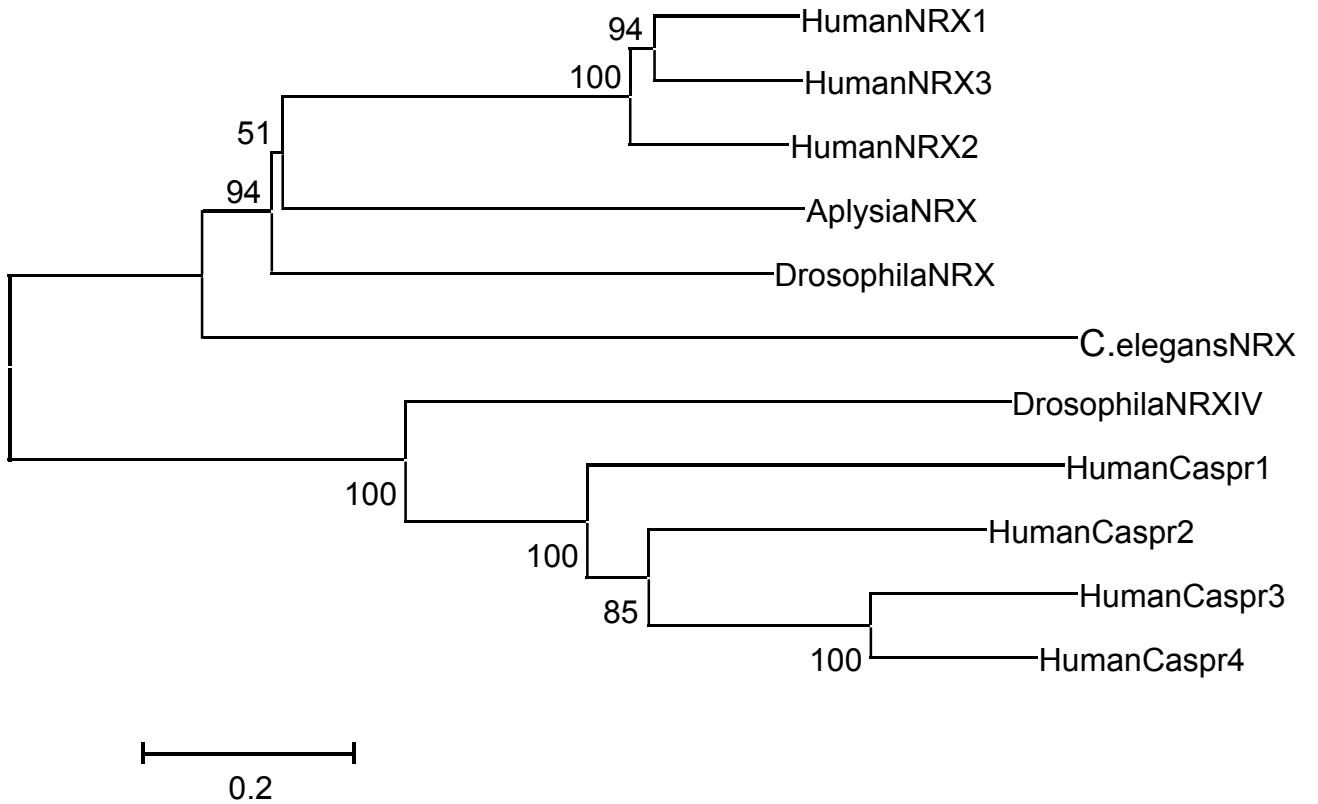

### C. Sequence Alignment of NLG

```

DrosophilaCG34127      ..... ..MVMLLSKR QLPPSAATRT RRVKVPTRRR STWALSLLA
DrosophilaCG34139      .....
DrosophilaCG13772     MAQTKIIQSR FLHIYGLLCL GSLMGCIKTI GASIAQQTIA DADAPDEAKA KEREAE2DAD
HumanNLG4X-linked      .....
HumanNLG4Y-linked      .....
HumanNLG1               .....
HumanNLG3               .....
HumanNLG2               .....
AplysiaNLG             .....
DrosophilaCG31146     ..... ..MKFRLAAF WLFLLTVGGN HKLLSHVSPM GVAAEQQLH
C.elegansNLG           .....

```

```

DrosophilaCG34127     LVVLDICIAR CLAAGISYSS NSGNLSTSQK SPSSANNGGL VLISSSSATS SSVPSLSLTS
DrosophilaCG34139     ..... ..MGES QLLLLLRLLL
DrosophilaCG13772     ADAEGDAKAE TETGKGTREH TNGDAEADAR IMATGICII R LITLKRFLN SKTEEHNR
HumanNLG4X-linked      ..... ..MSRP QLLWLPPLF TPVCVMLNSN VLLWLALAI
HumanNLG4Y-linked      ..... ..MLRP QLLWLPPLF TSVCMVLSN VLLWITALAI
HumanNLG1               ..... ..MAL PRCTWPYVW RAVMACLVHR GLGAPLTLCM
HumanNLG3               ..... ..MW LRLGPPSLSL SPKPTVGRSL
HumanNLG2               ..... ..MW LLALCLVGLA GAQRGGGGPG
AplysiaNLG             ..... ..MDTTRP APSPPSSSS ASVTLVSRHL TLTVLVHLLL
DrosophilaCG31146     KGNELENAMK LREAPKQSRV IGDITTTIQP DSDPGRSIGH QALRRAKAPP PSLELHFRQN
C.elegansNLG           ..... ..M ERIYLLLLLF

```

```

DrosophilaCG34127     SSSAGLSSPG SSSSSSSST STSGSNSNR SRPTSNNNS NSNYSPNHQ LPAQLSSRII
DrosophilaCG34139     LPTVLISWMH CAGASTAD..... ..IY KGARLGHRIV
DrosophilaCG13772     QQSATSAASA APAGATSPRR RHLHPGHS VQPGHPEACA LLVLLLLTSL WPDCCCLHG
HumanNLG4X-linked      KFTLIDS... ..QAQYPVV
HumanNLG4Y-linked      KFTLIDS... ..QAQYPVV
HumanNLG1               LGCLLQAGHV ..... ..LS QKLDVDPV
HumanNLG3               CLTLWFLSLA ..... ..LR ASTQAPAPT
HumanNLG2               GGAPGGPGLG ..... ..LG SLGEERFPVV
AplysiaNLG             LSPLVPPSAS ..... ..VV YFRQMSDRVI
DrosophilaCG31146     LNKLFAGDET THVGHNTATD NTAAVLATD EGSSEHEPST THHPERRHV PDKLQYQEI
C.elegansNLG           LPR..... ..IRSYDVRV

```

```

DrosophilaCG34127     NTRNGAISGV IVQLDG.RHL DPVEAYRGIP YASPPVGNLR FMPPVSA.M WSGVKKADR
DrosophilaCG34139     QTRYGRLHGL ILPLDSFRFL RSVEVFLGVP YATPPTKQNR FSPTRAPA.P WDGIRISDKY
DrosophilaCG13772     GSNTVKTKYG LLRGIVRVS PLVEAFLGIP YASPPVGLR FMPPITPS.T WKTVRSADR
HumanNLG4X-linked      NTNYGKIRGL RTPLPN.EIL GPVEQYLGVP YASPTGERR FQPPEPPS.S WTGIRNTQF
HumanNLG4Y-linked      NTNYGKIQGL RTPLPS.EIL GPVEQYLGVP YASPTGERR FQPPEPPS.S WTGIRNATQF
HumanNLG1               ATNFGKIRGI KKELENN.EIL GPVIQFLGVP YAAPTGERR FQPPEPPS.P WDIRNATQF
HumanNLG3               NTHFGKLRGA RVPLPS.EIL GPVDQYLGVP YAAPPIGEKR FLPPPEPP.Y WSGIRNATHF
HumanNLG2               NTAYGRVRGV RRELENN.EIL GPVVQFLGVP YATPPLGARR FQPPEAPA.S WPGVRNATIL
AplysiaNLG             TTRYGKVRGI LVQFEN.KNL KSVEAYLGLR YADLDGGGMR FMPPKNPKDQ WNGIRVAISH
DrosophilaCG31146     QVKQGRLMGI TRRFQVTSGL RQVDQFLGLP YAEAPTGNRR FMPPGAPL.P WQGLKIARHL
C.elegansNLG           TTSWGMVRGE VVSPEG.DDL PPVAQYLGIP YGVAPTQYR FNMAISAAKW THMPKDARKV

```

```

DrosophilaCG34127     SPVCPQRLPD IHNETAALER MPKGRLEYLK RLLPYLQNS EDCLYLNIVY PIQVGSRDSS
DrosophilaCG34139     SPVCPQRLPN IQNETAALEK MPKGRLEYLK RLLPFLENQS EDCLYLNIVS PVN..AGANE
DrosophilaCG13772     SPVCPQNIPI PPNGPEALLE VPRARLAQLR RLLPLLNQNS EDCLYLNIVY PYETRRQRN
HumanNLG4X-linked      AAVCPQH... LDERSLLHDM LPIWFTANLD TLMYVQDQN EDCLYLNIVY PTEDDIHQ.
HumanNLG4Y-linked      SAVCPQH... LDERFLLHDM LPIWFTSLD TLMYVQDQN EDCLYLNIVY PMEDIHQ.
HumanNLG1               APVCPQN... IIDGRLEPEV LPVWFTNLD VVSSVQDQS EDCLYLNIVY PTEDDIRDS.
HumanNLG3               PPVCPQN... IHT.AVPEVM LPVWFTANLD IVATYIQEPN EDCLYLNIVY PTEDGSGAKK
HumanNLG2               PPACPN... LHG.ALPAIM LPVWFTDNLE AAATYVQNS EDCLYLNIVY PTEDGSLTKK
AplysiaNLG             QVCPQP... TTHRELNQO LPKGRVDQLR NITPFITEQK EDCLTLNLYV PKQEWNETKP
DrosophilaCG31146     PPVCPQKLP. .DLSPHGSEN MSRARHKHLS RLLPYLRTES EDCLYLNIVY PHEEPQSTPK
C.elegansNLG           SPVCIQTDMPELSETKAFKH TSAQRDFDNH RLLPHLKKQS EDCLYMNIVY PERLEISRDN

```

```

DrosophilaCG34127     GSSSSSSAGS SSSSGSGSS SSSSSSTSSS SAGSGSPAKY PVLVVFHGES YEWNSGNPYD
DrosophilaCG34139     KK..... ..L PVIVFIHGES FEWSSGNPYD
DrosophilaCG13772     TDDT..... ..TGEPKTKL STVVFIHGES YDWNNSGNPYD

```

|                   |            |       |       |       |             |            |            |
|-------------------|------------|-------|-------|-------|-------------|------------|------------|
| HumanNLG4X-linked | .....      | ..... | ..... | ..... | NSKK        | PVMVYIHGGS | YMEGTGNMID |
| HumanNLG4Y-linked | .....      | ..... | ..... | ..... | NSKK        | PVMVYIHGGS | YMEGTGNMID |
| HumanNLG1         | .....      | ..... | ..... | ..... | GGPK        | PVMVYIHGGS | YMEGTGNLYD |
| HumanNLG3         | QGEDLADNDG | ..... | ..... | DE    | DEDIRDSGAK  | PVMVYIHGGS | YMEGTGNMID |
| HumanNLG2         | RDEATLN... | ..... | ..... | PP    | DTDDIRDPGKK | PVMLFLHGGS | YMEGTGNMFD |
| <b>AplysiaNLG</b> | .....      | ..... | ..... | ..... | M           | AVMVVFHGES | YQTGTGNAYD |
| DrosophilaCG31146 | QY.....    | ..... | ..... | ..... | .....       | AVLVYLHGGS | FEWNSGNPYD |
| C.elegansNLG      | .....      | ..... | ..... | ..... | YL          | PVMVIVHGEE | YGWGTGNAFN |

|                   |                   |                    |                   |                  |                   |                   |
|-------------------|-------------------|--------------------|-------------------|------------------|-------------------|-------------------|
| DrosophilaCG34127 | GSVLASYGQI        | LVVTINRYRLG        | VLGFLNANTD        | RYSKL..PAN       | YGLMDIIAAL        | HWLKENIAAF        |
| DrosophilaCG34139 | GSVLASYGEV        | VVVTLNRYRLG        | ILGFLNANPN        | PHAHAR.VAN       | YGLMDQMAAL        | HWIQQNIQKF        |
| DrosophilaCG13772 | GSELAAHGNV        | IVVTINFRLG         | IFGFLKTGGK        | ESAQG...N        | FGLMDLVAGL        | HWLKENLPFAF       |
| HumanNLG4X-linked | GSILASYGNV        | IVITINRYRLG        | ILGFLSTGDQ        | AAKGN....        | YGLLDQIQAL        | RWIBENVGAF        |
| HumanNLG4Y-linked | GSILASYGNV        | IVITINRYRLG        | ILGFLSTGDQ        | AAKGN....        | YGLLDQIQAL        | RWIBENVGAF        |
| HumanNLG1         | GSVLASYGNV        | IVITVNYRLG         | VLGFLSTGDQ        | AAKGN....        | YGLLDLIQAL        | RWTSENIGFF        |
| HumanNLG3         | GSILASYGNV        | IVITLNRYRVG        | VLGFLSTGDQ        | AAKGN....        | YGLLDQIQAL        | RWVSENIAGF        |
| HumanNLG2         | GSVLAAYGNV        | IVATLNRYRLG        | VLGFLSTGDQ        | AAKGN....        | YGLLDQIQAL        | RWLSENIAHF        |
| <b>AplysiaNLG</b> | <b>GSVLSFFGDV</b> | <b>IVVTLNRYRLG</b> | <b>VLGFLTTEDH</b> | <b>AAMGN....</b> | <b>YAMLDITQAL</b> | <b>LWLRENIASF</b> |
| DrosophilaCG31146 | GSVLSYGEV         | IVVTVNYRLG         | VLGFLRPSID        | AHNIAN...        | YALLDQIAAL        | HWTKENIEAF        |
| C.elegansNLG      | GTTLAAYGHI        | IVVTLNRYRLG        | VFGFLGRCES        | SSCSGN...        | SGISDLVSAL        | TMLNVILPSF        |

|                   |                   |                  |                   |                  |                   |                   |
|-------------------|-------------------|------------------|-------------------|------------------|-------------------|-------------------|
| DrosophilaCG34127 | GGDPNSITLA        | GHGGAACVH        | FLISSMAVPE        | GL.....L         | FNRAILMSGS        | GLAPWSLVSN        |
| DrosophilaCG34139 | GGDPNSVTLA        | GHGGAACIN        | YLMTSPTMVR        | G.....L          | FHRAILMSGS        | AYSSWALVED        |
| DrosophilaCG13772 | GGDPQSITLL        | GYGTGAVLAN       | ILVVSP..VA        | SD.....L         | IQRTVLVSGS        | ALSPWAIQKN        |
| HumanNLG4X-linked | GGDPKRVTIF        | GSGAGASCVS       | LLTLSHYSEG        | .....L           | FQKAIQSGT         | ALSSWAVNYQ        |
| HumanNLG4Y-linked | GGDPKRVTIF        | GSGAGASCVS       | LLTLSHYSEG        | .....L           | FQKAIQSGT         | ALSSWAVNYQ        |
| HumanNLG1         | GGDPLRITVF        | GSGAGGSCVN       | LLTLSHYSEG        | NRWSNSTKGL       | FQRAIAQSGT        | ALSSWAVSFQ        |
| HumanNLG3         | GGDPRRITVF        | GSGIGASCVS       | LLTLSHHSEG        | .....L           | FQRAIQSGS         | ALSSWAVNYQ        |
| HumanNLG2         | GGDPERITVF        | GSGAGASCVN       | LLLSHHSEG         | .....L           | FQKAIQSGT         | AISSWSVNYQ        |
| <b>AplysiaNLG</b> | <b>NGDPQRVTLF</b> | <b>GHGGAIAVN</b> | <b>LLLLSPFISE</b> | <b>DRGK....Y</b> | <b>FQRAILQSGS</b> | <b>ASSSWAVSYD</b> |
| DrosophilaCG31146 | GGDNSRVTLM        | GHSTGAACVN       | YLMVSPVASG        | .....L           | FHRAILMSGS        | AMSDWAASNQ        |
| C.elegansNLG      | GGDSKSVTLA        | GWGSGASLVS       | LLMASPLTQP        | GRR.....L        | FRRAILLDGS        | ALSPWAIQSN        |

|                   |                   |                   |                   |                   |                   |                  |
|-------------------|-------------------|-------------------|-------------------|-------------------|-------------------|------------------|
| DrosophilaCG34127 | PAKYAAIVAH        | HVNCA....         | SDLP...HA         | HLMKCLREKT        | LDQLLSVPIR        | PPEFGFAFGP       |
| DrosophilaCG34139 | PVLFAIKLAK        | EVNCT....         | IPDDINRHE         | QIVDCLRDVP        | LEDLYLADIQ        | APNFLTSEFGP      |
| DrosophilaCG13772 | PLFVKRRVAE        | QTGCH....         | GDMLY...D         | DLAPCLRTKS        | VAELLAVKVD        | HPRFLVGFAP       |
| HumanNLG4X-linked | PAKYTRILAD        | KVGCNMLDTT        | .....             | DMVECLRNKN        | YKELIQQTIT        | PATYHIAFGP       |
| HumanNLG4Y-linked | PAKYTRILAD        | KVGCNMLDTT        | .....             | DMVECLRNKN        | YKELIQQTIT        | PATYHIAFGP       |
| HumanNLG1         | PAKYARMLAT        | KVGCNVSDTV        | .....             | ELVECLQKPP        | YKELVDQDIQ        | PARYHIAFGP       |
| HumanNLG3         | PVKYTSLLAD        | KVGCNVLDTV        | .....             | DMVDCLRQKS        | AKELVEQDIQ        | PARYHVAFGP       |
| HumanNLG2         | PLKYTRLLAA        | KVGCNMLDTS        | .....             | EAVECLRRKP        | SRELVDQVQV        | PARYHIAFGP       |
| <b>AplysiaNLG</b> | <b>PRWCTEKLAM</b> | <b>NVNCNR....</b> | <b>....HLANSK</b> | <b>ALIHCLRERS</b> | <b>WAEVLSNVXP</b> | <b>APKYSCFAP</b> |
| DrosophilaCG31146 | SLQLTMQIAH        | ALECPLNEHV        | EAEDD...D         | VLLDCLRHR         | YQDILHIPTA        | LTQFSTSLGP       |
| C.elegansNLG      | PQQYFMQLAE        | ELACAPKNRT        | SSFNDNVDTI        | VRCMQVHSSE        | NITKAVLKID        | VPTFLSFGAP       |

|                   |                   |              |              |              |              |              |
|-------------------|-------------------|--------------|--------------|--------------|--------------|--------------|
| DrosophilaCG34127 | SIDG.....V        | VIDGGDYVPP   | APGSPAAQAQ   | AQASTAAGN.   | .....GLGG    | EAGIAAAGGW   |
| DrosophilaCG34139 | SVDG.....V        | VIRPGHSNLD   | IDDLMARNR    | RSSADSGFQS   | SAGGGGGQGG   | GAGGGGGGGS   |
| DrosophilaCG13772 | FVDG.....         | .....        | TVISPGANPL   | GSTTLPLG..   | .....        | .....        |
| HumanNLG4X-linked | VIDG.....         | .....        | .....        | .....        | .....        | .....        |
| HumanNLG4Y-linked | VIDG.....         | .....        | .....        | .....        | .....        | .....        |
| HumanNLG1         | VIDG.....         | .....        | .....        | .....        | .....        | .....        |
| HumanNLG3         | VIDG.....         | .....        | .....        | .....        | .....        | .....        |
| HumanNLG2         | VVDG.....         | .....        | .....        | .....        | .....        | .....        |
| <b>AplysiaNLG</b> | <b>SIDHYT....</b> | <b>.....</b> | <b>.....</b> | <b>.....</b> | <b>.....</b> | <b>.....</b> |
| DrosophilaCG31146 | IVDG.....         | .....        | .....        | .....        | .....        | .....        |
| C.elegansNLG      | IVDG.....         | .....        | .....        | .....        | .....        | .....        |

|                   |                   |                   |                   |                   |                   |                  |
|-------------------|-------------------|-------------------|-------------------|-------------------|-------------------|------------------|
| DrosophilaCG34127 | GTPGQLENIV        | LMRKTAINKL        | SRYDLMAGVT        | RAEAFFSFN.        | SGDVQYQIEA        | DRRSRILKAY       |
| DrosophilaCG34139 | GSSFGGGYFG        | GSGAGTMNMG        | GHYDLVFGVV        | TGESIWRFS.        | AHDIQNGFEG        | ERRDKIIRTY       |
| DrosophilaCG13772 | .....SATV         | STSGIEYANF        | PKRDLIFCLT        | SVESYLDLS.        | AQDLEFGFNE        | TRRDRIIRTF       |
| HumanNLG4X-linked | ....DVIPDD        | PQILMEQGEF        | LNVDIMLGVN        | QGEGLKFVDG        | IVDNEDGVTP        | NDFDFSNSNF       |
| HumanNLG4Y-linked | ....DVIPDD        | PQILMEQGEF        | LNVDIMLGVN        | QGEGLKFVDG        | IVDNEDGVTP        | NDFDFSNSNF       |
| HumanNLG1         | ....DVIPDD        | PQILMEQGEF        | LNVDIMLGVN        | QGEGLKFVEN        | IVSDDDGISA        | SDFDFAVSNF       |
| HumanNLG3         | ....DVIPDD        | PEILMEQGEF        | LNVDIMLGVN        | QGEGLKFVEG        | VVDPEDEGVS        | TDFDYSVSNF       |
| HumanNLG2         | ....DVVPDD        | PEILMQQGEF        | LNVDMLIGVN        | QGEGLKFVED        | SAESEDGVS         | SAFDFTVSNF       |
| <b>AplysiaNLG</b> | <b>...VLPSEVD</b> | <b>QMIKERNKSF</b> | <b>ASVPVMFGIT</b> | <b>KNEAYSYLK.</b> | <b>QQEIRKGISD</b> | <b>NRKTIIRTY</b> |

DrosophilaCG31146 ..HVIPNQPY KVMGHYTEHF SRYDLLFGIT ESESYHTLA. ALALEEGLRE NERDNLRFY  
C.elegansNLG .QLIPNKQV SFSTQYGLF REIDLVLGIS SNPSHHMIS. NEDLKVGIS EKRMRIFRSL

DrosophilaCG34127 VRNTYTFHLN ..EIFATIVN EYTDWERPVQ HPINIRDETL EALSDAQVVA PAAQTVDLHS  
DrosophilaCG34139 VRNAYNYHLN ..EIFYTIIVN EYTDWDRTSQ HPINTRDTAV AALSDAQFVA PIVRAGDILA  
DrosophilaCG13772 VRNNFYHLN ..EIFAVLKN EYTDWEKAIR NPLSSRDATL QFLSDGHTAS PLIKLGYMHS  
HumanNLG4X-linked VDNLYGYPEG KDTLRETIFK MYTDWADK.E NPETRRKTLV ALFTDHQWVA PAVATADLHA  
HumanNLG4Y-linked VDNLYGYPEG KDTLRETIFK MYTDWADK.E NPETRRKTLV ALFTDHQWVA PAVATADLHA  
HumanNLG1 VDNLYGYPEG KDVLRETIFK MYTDWADR.H NPETRRKTLV ALFTDHQWVA PAVATADLHS  
HumanNLG3 VDNLYGYPEG KDTLRETIFK MYTDWADR.D NPETRRKTLV ALFTDHQWVE PSVVTADLHA  
HumanNLG2 VDNLYGYPEG KDVLRETIFK MYTDWADR.D NGEMRRKTLV ALFTDHQWVA PAVATAKLHA  
AplysiaNLG VQNVFRFHRQ ..KIYEILDH HYTDWTHS.S DQISNRDNIL ELLSDGQYVA PLVKVAGLHA  
DrosophilaCG31146 MQSRFDIRPD LALAATLKKY QDMYNNPIKA TNLEHRDVVL DILSDARVVG PLLQTGMFHA  
C.elegansNLG VRNLYDFHRE ..EILASIIN EYTDWENPRD HPKSIRNGVL NALSDVLYTA PLIETLRSHS

DrosophilaCG34127 ADHR..... .NSYLYVF DYQTRFGDYP QRQGCIHGED  
DrosophilaCG34139 ANSPPPVSSS STAGSPGANA AASTSAGSTQ PSGRCYFYVF DYQTKDGDYP QRMGTVHGED  
DrosophilaCG13772 LRGG..... .RAYFLHF KHKTIEEYYP QRSGSVAGED  
HumanNLG4X-linked QYGS..... .PTYFYAF YHHCQSEMKP SWADSAHGDE  
HumanNLG4Y-linked QYGS..... .PTYFYAF YHHCQSEMKP SWADSAHGDE  
HumanNLG1 NFGS..... .PTYFYAF YHHCQTDQVP AWADAAGHDE  
HumanNLG3 RYGS..... .PTYFYAF YHHCQSLMKP AWSDDAAGHDE  
HumanNLG2 DYQS..... .PVYFYTF YHHCQAEGRP EWADAAGHDE  
AplysiaNLG DTAD..... .TYLYSF AYSTQTEASG .DVQGIHGDE  
DrosophilaCG31146 DVNR..... .RNYMYVF GHNSATGPFA HLPHSIMGEE  
C.elegansNLG ADEVR..... KEANTFMFAF AHETRWSQEQ QPNSGIRGSL

DrosophilaCG34127 ....LPYIFG APLVGG.... FNHFTRNYTK TEISLSEVVM FYWSNFVRTG NP....NEQ  
DrosophilaCG34139 ....LPYIFG APLVDG.... FSHFPQNYTK SETALSEAVM IFWTFNFARTG NP...NEHHR  
DrosophilaCG13772 ....VPFWLG LPMSP.... .LFPHNYTT QERQIGRLML RYLSNFAKTG NPNQSTAKSV  
HumanNLG4X-linked ....VPYVFG IPMIGP.... TELFSCNFSK NDVMLS AVVM TYWTFNAKTG DPN....QP  
HumanNLG4Y-linked ....VPYVFG IPMIGP.... TELFSCNFSK NDVMLS AVVM TYWTFNAKTG DPN....QP  
HumanNLG1 ....VPYVFG IPMIGP.... TELFPCNFSK NDVMLS AVVM TYWTFNAKTG DPN....QP  
HumanNLG3 ....VPYVFG VPMVGP.... TDLFPCNFSK NDVMLS AVVM TYWTFNAKTG DPN....KP  
HumanNLG2 ....LPYVFG VPMVGA.... TDLFPCNFSK NDVMLS AVVM TYWTFNAKTG DPN....QP  
AplysiaNLG ....LPYVFG SPLVDG.... SSFPSSSYTN TEKMLSEAVM TYWTFNAKSG NPN....EPR  
DrosophilaCG31146 ....LAFIFG APLAAG.... .PFPSGNYTV QEKLLSEAVM AYWTFNFVKTG NPK.....  
C.elegansNLG SGDIVPYIFG YPLAQGD..S EERLYSGFNT DDKGISKVMM HYVSNFVKSG DPSKPNPMSK

DrosophilaCG34127 METEHGSRQE RSRYKT.... . . . . .  
DrosophilaCG34139 QDSSLVPSKE RNRFRS.... . . . . .  
DrosophilaCG13772 LPNPNEVLET ALHQQKRST SLTHPNLSEA LNLAVLYNQR RSNAMHEKRS YIRRRRLSND  
HumanNLG4X-linked VPQDTKFIHT KPNR..... . . . . .  
HumanNLG4Y-linked VPQDTKFIHT KPNR..... . . . . .  
HumanNLG1 VPQDTKFIHT KPNR..... . . . . .  
HumanNLG3 VPQDTKFIHT KANR..... . . . . .  
HumanNLG2 VPQDTKFIHT KPNR..... . . . . .  
AplysiaNLG NQTSVHGDKV NNRFVD.... . . . . .  
DrosophilaCG31146 APWKGIFINS HALEWDR.... . . . . .  
C.elegansNLG NFPMGDVFHS T..... . . . . .

DrosophilaCG34127 ..... . IEWTAYE. SVHKYLNFD TKPKLKNHYR AHRLSFWLNL  
DrosophilaCG34139 ..... . ITWENYD. PLHQKYLEIG MKPRIKNHFR AHQLSIWLR  
DrosophilaCG13772 AAFTQLGISS ERDVGSYDGD ELPFWDAYD. VVNQLYVELG NKANIQSHYR GHKLSMWLNL  
HumanNLG4X-linked .....F EEVAWSKYN. PKDQLYLHIG LKPRVRDHYR ATKVAFWLEL  
HumanNLG4Y-linked .....F EEVAWSKYN. PKDQLYLHIG LKPRVRDHYR ATKVAFWLEL  
HumanNLG1 .....F EEVAWTRYS. QKDQLYLHIG LKPRVKEHYR ANKNVNLWLEL  
HumanNLG3 .....F EEVAWSKYN. PRDQLYLHIG LKPRVRDHYR ATKVAFWKHL  
HumanNLG2 .....F EEVWSKFN. SKERQYLYHIG LKPRVRDNYR ANKVAFWLEL  
AplysiaNLG ..... .LKWPKYT. RDTQEYLPIG RRPSIRHHYR AQKLALWLDL  
DrosophilaCG31146 ..... YDLDWPEFN. RRAQAYLNIQ IPPTVGYKYR QIYMNFWNKE  
C.elegansNLG ..... .AWPQFDQ PNREAYLEIT DRPRVKNYR NAQVGFWNNF

DrosophilaCG34127 IPDLHKPGGD NVPAAAHQHL DDDDEDNIP S.....DASV KPLNPPYISR AANAAMANF  
DrosophilaCG34139 IPDLHRAGME DVIARHNLFR NHDDMDLYEG .....P VKPDPFGIST AAGASGSSSS  
DrosophilaCG13772 IPQLHRHFNI NDQSMRHQF QDDMNNRDLY EGVVRPQLQT KPAEDDNI I MQRSRRTTTP







DrosophilaCG13772 .....  
 HumanNLG4X-linked .....  
 HumanNLG4Y-linked .....  
 HumanNLG1 .....  
 HumanNLG3 .....  
 HumanNLG2 .....  
 AplysiaNLG .....  
 DrosophilaCG31146 APGRSITTNI  
 C.elegansNLG .....

## D. Sequence Alignment of NRX

DrosophilaNRX MKAPHSATYQ DNYADAAMTA RTRPSMDMDQ QRNRNQAE LR LLPAQRTST S AFESPD LRFN  
 HumanNRX1 .....  
 HumanNRX3 .....  
 HumanNRX2 .....  
 AplysiaNRX .....  
 C.elegansNRX .....

DrosophilaNRX KARRRRRSEQ VPPVVVEYRR SYRVLIVSAL LVSLAASFVT LSAGFQLDGS QNSFYTFRKW  
 HumanNRX1 .....MGTALL QRGGCFLLCL SLLLLGCWAE LGSGLEFPGA EGQWTRFPKW  
 HumanNRX3 .....MSS TLHSVFFTLK VSILGSLG LCLGLEFMGL PNQWARYLRW  
 HumanNRX2 .....MASG SRWRPTPPPL LLLLLLALAA RADGLEFGGG PGQWARYARW  
 AplysiaNRX .....M AVELFPFSPR HLQCLTLAVA IFAAILCRLP CAHTLNLDGS PGSYVEYPPW  
 C.elegansNRX .....MRQK FDDTGQYLTI WLVTVSLFS VVDSIILTGA PDSYARYPKW

DrosophilaNRX Y.TGLNGTLE LEFKTEQPNG LVLYTDDGGT YDFFELKLVE G.ALRLRYNL G.GGAQIIT.  
 HumanNRX1 N.ACCESEMS FQLKTRSARG LVLYFDDEGF CDFLELILTR GGRLQLSFSI FCAEPATLL.  
 HumanNRX3 D.ASTRSDLS FQFKTNVSTG LLLYLDGGV CDFLCLSLVD G.RVQLRFMS DCAETAVLS.  
 HumanNRX2 AGAASSGELS FSLRTNATRA LLLYLDGGD CDFLELLLV D G.RLRLRFTL SCAEPATLQ.  
 AplysiaNRX E.PCLNGSFS FEERTSEPLS LLLYLN.R.GS YSYFEVKLLK G.GIRLRMNL G.ERTMIIR.  
 C.elegansNRX A.HSFENSL S MELKTRQSDG MLLYTDDGGT HGNFYSLTIV EGHIQDLDFRL GDNSNEFGQR

DrosophilaNRX .....VG RELHDGHWK VQVLRNDEQT SLIVDGVSSQ RSTKGKEFQF GKFASNSDVY  
 HumanNRX1 .....AD TPVNDGAWHS VRIRRQFRNT TLFIDQVEAK WVEVKSRRD ..MTVFSGLF  
 HumanNRX3 .....NK Q.VNDSSWHF LMVSRDRLRT VLMLD.GEGQ SGELQPQRPY ..MDVVSDFL  
 HumanNRX2 .....LD TPVADDRWHM VLLTRDARRT ALAVD.GEAR AAEVRSKRRE ..MQVASDFL  
 AplysiaNRX .....AG QNLNDNKWHS VEVVQDGLT TLIVDGIHES KTSSGLLHTY NGLANETFLY  
 C.elegansNRX RPVNTIRIEE VRIDDDKWH TLFIQSWENV KLELDYTLVF KILNQRSFVF GNILKNSDVF

DrosophilaNRX VGGMPNWYS. SKLALLALPS VIFEPFRGA IRNLVYADQP GGSTRRQEIK QQRDIKCGDV  
 HumanNRX1 VGGLPPELR. AAALKLTLAS VREREPFGW IRDVRVNSSQ VLPVDSGEVK LDDEPPNSGG  
 HumanNRX3 LGGVPTDIR. PSALTLDGVQ AMPG..FKGL ILDLKYGNSE PRLGSRGVQ MDAEGPCGER  
 HumanNRX2 VGGIPPDVR. LSALTTLSTVK YEPP..FRGL LANLKLGERP PALGSGQLR GATADPLCAP  
 AplysiaNRX LGGLPMEYES KFNLSLALPS VIFEPKFRGS VRNFFYRSCG GEAVRPQPLS SAGLLTDDVD  
 C.elegansNRX IGGLPNMH. .MLPVMSSPL RRYARHLAVN VRNLMYRQYP QGVTSPQLE SVGTRTNEDD

DrosophilaNRX PCDHGELPAR ERPLRGVGG NTTDACERND PCQHGGICIS TDS.GPICEC RNLEYDQGYC  
 HumanNRX1 GSPC..... .EAGEEGEGG VCLNGGVCVS VDD.QAVCDC SRTGFRGKDC  
 HumanNRX3 P.....EGL SHLMMS..... .CENGGICFL LDG.HPTCDC STTGYYGKLC  
 HumanNRX2 ARN..... .PCANGGLCTV LAPGEVGCDC SHTGFGGKFC  
 AplysiaNRX LCER..... .GN PCLNGGRCLT TDN.GVLCDC TATEYRGDRC  
 C.elegansNRX HCKS..... .KSMSSREQF VCLNDGECYS SND.GPHCDC QFSDDHGRNC

DrosophilaNRX EKE..... .KAPSEAT FRGTQFLSYD  
 HumanNRX1 SQEDNNVEGL AHLMMG..... .DQGK SKGKEYIAT FKGSEYFCYD  
 HumanNRX3 S.....EGL SHLMMS..... .EQAR .....EENVAT FRGSEYLCYD  
 HumanNRX2 SEEEHPMEGP AHLTLNSEVG SLLFSEGGAG RGGAGDVHQP TKGKEEFVAT FKGNEFFCYD  
 AplysiaNRX DIQ..... .KIPSDAT FMGTQYFSYN  
 C.elegansNRX EIE..... .KNDGELT FGGDEWVGYD

DrosophilaNRX LGQTGAEPV SAQDAISFYF RTRQPNGLLF YTGHG..... .TDYL NLALRDGGVS

HumanNRX1 LSQLN...PIQ SSSDEITLSF KTLQRNGLML HTGKS.....ADYV NLALKNGAVS  
HumanNRX3 LSQLN...PIQ SSSDEITLSF KTWQRNGLIL HTGKS.....ADYV NLALKDGAVS  
HumanNRX2 LSHN...PIQ SSTDEITLAF RTLQRNGLML HTGKS.....ADYV NLSLKSQAVW  
AplysiaNRX LSSR..GDVM VDQDRVRLDF RTKQANSLLF YTGNS.....KDYM TVGLMDGAVF  
C.elegansNRX VSLNISAAVR AKKENLTLTF KTVHGTSMLE YAGDE.....KSYL HVMLQDGAI

DrosophilaNRX LTMGLANG..KQEMHIKPS KVRFDHWH KVTVHRIQE ISSITSFCR.....LVTVV  
HumanNRX1 LVINLGS..AFEALVEPV NGKFNDNAWH DVKVTRNLRO HSGIGHAMV.....TISV  
HumanNRX3 LVINLGS..AFEALVEPV NGKFNDNAWH DVKVTRNLRO VT.....ISV  
HumanNRX2 LVINLGS..AFEALVEPV NGKFNDNAWH DVKVTRNLRO HAGIGHAMVN KLHYLVTISV  
AplysiaNRX LTINLGS..MYQAEIRPS GTRFDNRRWH QLLIQREARE LPRDAGVCFV T.....MEL  
C.elegansNRX ASSKFDGSDA RIIRMFNSFP SQRYDDDSWH TIILERSLQM MT.....LIV

DrosophilaNRX DDVYTDHSI AGKFTMLSSS .RVYVGGAVN PRALLGARVH TNFVGLRKY EFSADTLNLN  
HumanNRX1 DGILTTTGYT QEDYTMLGSD DFFYVGGSPS TADLPSPVS NNFMGCLKEV VYKNNDRLE  
HumanNRX3 DGILTTTGYT QEDYTMLGSD DFFYVGGSPS TADLPSPVS NNFMGCLKEV VYKNNDIRLE  
HumanNRX2 DGILTTTGYT QEDYTMLGSD DFFYVGGSPN TADLPSPVS NNFMGCLKDV VYKNNDFKLE  
AplysiaNRX DGMYRKQSSI TGKFISSLN .LLYVAGSPN TETLPGSRVR TNFKGCLRKY RYRAGVLLD  
C.elegansNRX DGRRDEIRQY APELDWISNS .FGFLGSIP KHNPSKEVNR VSRGCMKKV RYDIDATRIL

DrosophilaNRX LIDLAKS..G SKLIQVAGNL EYQ.CPSGDP QDPVTFTRT SHLVLPWET GKQ.SSISFK  
HumanNRX1 LSRLAKQ..G DPKMKIHGVV AFK.CENVAT LDPITFETPE SFISLPKWNA KKT.GSISFD  
HumanNRX3 LSRLARI..A DTKMKIYGEV VFK.CENVAT LDPINFETPE AYISLPKWNT KRM.GSISFD  
HumanNRX2 LSRLAKE..G DPKMKLQGD L SFR.CEDVAA LDPVTFESPE AFVALPRWSA KRT.GSISLD  
AplysiaNRX LTDLARR..E HSLMQVTGDV IFDKCQELVE SHPVTFTSPE SHLTIPWWSK PGIRGSLAFQ  
C.elegansNRX LVNLADQSYG GSVVKTEGDI SYSCKNPSQR SDVLSFTETS SYLTLPRWNS LSS.GSLSFH

DrosophilaNRX FRTKEPNGII VLATG.....SKQPRAKN PVLIAIELLN GHIYIHLDLG SGASKVRASR  
HumanNRX1 FRTTEPNGLI LFSHGKPRHQ KDAKHPQMIK VDFFAIEMLD GHLYLLDMG SGTIKIKALL  
HumanNRX3 FRTTEPNGLI LFTHGKPRHQ KDARSQKNTK VDFFAVELLD GNLYLLDMG SGTIKIKATQ  
HumanNRX2 FRTTEPNGLI LFSQRRAGG GAGSHSSAQR ADYFAMELLD GHLYLLDMG SGGIKLRASS  
AplysiaNRX FRTVEPPGLM MYSNG.....GRDS KDFFALELLD GHLYLVLDMG SGILKIQASK  
C.elegansNRX FRTTSSDGLI LYHGV.....MQHNA TDYVAFELID SHLFMIINLG SGVVRLOQTS

DrosophilaNRX RRVDDGDWHD LILRRNGRDA KVSVDGVWND FRTPGDGTIL ELDGHMYLGG VGPA.YNSVS  
HumanNRX1 KKVNDGEWYH VDFQRDGRSG TISVNTLRTP YTAPGESEIL DLDELYLGG LPEN.KAGLV  
HumanNRX3 KKVNDGEWYH VDIQRDGRSG TISVNSRRTT FTASGESEIL DLEGDMYLGG LPEN.RAGLI  
HumanNRX2 RRVNDGEWCH VDFQRDGRSG SISVNSRSTP FLATGDSEIL DLESELYLGG LPEGGRVDLP  
AplysiaNRX LPVSDGRPHD VYFEFKGYRG DISVDGQKVP FASGRVSDRF DLHGFFYVGG LGSE.INASL  
C.elegansNRX MKVSDGEWHH VQLDRLSRTG SVIVDAIKID FSTPGVSANL IIDDPIFIGN VPNN...SLV

DrosophilaNRX WPAAIWTATL RQGFVGLRD LVLSGKAIDI AAFARVQDSA SVKPSCHVQA N.VCNGNPC  
HumanNRX1 FPTEVWTALL NYGYVGCIRD LFIDGQSKDI RQMAEVQSTA GVKPSCSKET AK.PCLSNPC  
HumanNRX3 LPTELWTAML NYGYVGCIRD LFIDGRSJNI RQLAEMQNA GVKSSCSRMS AK.QCDSYPC  
HumanNRX2 LPPEVWTAAL RAGYVGCVRD LFIDGRSRDL RGLAEAQGAV GVAPFCSRET LK.QCASAPC  
AplysiaNRX LPRELWAVML GLSYVGCIRD LVLDGSKVDL LAAARLQNKD DVAGYKQTE P..QCVSHPC  
C.elegansNRX YPSSVWSIAL QKGYTGCIKN IRMNGVSTKI GQEFEASNST GIELGCCLSN ELDICEPNPC

DrosophilaNRX LNGGTCLEGW NRPICDCSAT LYGGPTCGRE LATLAFNGSQ HMTIWLGNQ GTKTQTEELV  
HumanNRX1 KNNMCRDGW NRYVDCDSGT GYLGRSCERE ATVLSYDGS FMKIQLP..V VMHTEADVS  
HumanNRX3 KNNAVCKDGW NRFICDCGT GYWGRTCERE ASILSYDGS YMKIIMP..M VMHTEADVS  
HumanNRX2 RNGGVCREGW NRFICDCGT GFLGRVCERE ATVLSYDGS YMKIIMP..N AMHTEADVS  
AplysiaNRX NHGKCVEGW NRFSCDCRAT GFVAVCQTA AATLQFDGTQ FMKVTMS..R ESVTQAEVDS  
C.elegansNRX QNFGKCSKNL NSFDCDCSNT NFEKGQCELE QTAVEVNGEE SKVHVLA..H TRVQSVEHIK

DrosophilaNRX IRFKTSRPAG LLLLSAESN SPDRLEIALV AGRVRSVRL SDR.....EKNLLAGQ  
HumanNRX1 LRFRSQRAYG ILMATTSR.D SADTLRLELD AGRVKLTVNL DCIRINCNS KGPETLFAGY  
HumanNRX3 FRFMSQRAYG LLVATTSR.D SADTLRLELD GGRVKLMVNL DCIRINCNS KGPETLYAGQ  
HumanNRX2 LRFMSQRAYG LMMATTSR.E SADTLRLELD GGQMKLTVNL DCLRVCAPS KGPETLFAGH  
AplysiaNRX LRFRSLHPSG LLFLTTGG..NDNRMQLFLO QGTLFLSVNV GSG.....SKVLSVGH  
C.elegansNRX IRFRTTSSRG VLFDTGAN.G KNDKITVFLN DSQNLNLFQD SSTN.....NTFSWG

|               |            |            |            |            |            |             |
|---------------|------------|------------|------------|------------|------------|-------------|
| DrosophilaNRX | SVLNDNNWHT | IRFSRRASNL | RLQVDG.... | .....      | .....      | ..APPVRAET  |
| HumanNRX1     | NLN.DNEWHT | VRVVRGKSL  | KLTVD....  | .....      | .....      | ..DQQAMTGQ  |
| HumanNRX3     | KLN.DNEWHT | VRVVRGKSL  | KLTVD....  | .....      | .....      | ..DDVAEG.T  |
| HumanNRX2     | KLN.DNEWHT | VRVVRGKSL  | QLSVD....  | .....      | .....      | ..NVTVEG.Q  |
| AplysiaNRX    | RLN.DDRWHT | VFIRRRVQTV | ELAIDSDRPV | IDQLPGSTFS | LATNYIFVGH | KNFPPGTEVAD |
| C.elegansNRX  | KSLSDNHWE  | LQVRRLGQKL | LLYLDG.... | .....      | .....      | .....FWSH   |

|               |            |            |            |            |            |            |
|---------------|------------|------------|------------|------------|------------|------------|
| DrosophilaNRX | ILGRHSTMEI | RSVHLGGLF. | ..HAEEEIQM | TSTMPNFVGQ | MQGLVFNQQR | YLDIVKSLGP |
| HumanNRX1     | MAGDHTRELF | HNIETG.... | ..IITERRYL | SSVPSNFIGH | LQSLTFNGMA | YIDLCKNGDI |
| HumanNRX3     | MVGDHTRLEF | HNIETG.... | ..IMTEKRYI | SVVPSFIGH  | LQSLMFNGLL | YIDLCKNGDI |
| HumanNRX2     | MAGAHMRLEF | HNIETG.... | ..IMTERRFI | SVVPSNFIGH | LSGLVFNQGP | YMDQCKDGI  |
| AplysiaNRX    | LPGRARELGL | SSVEAGHMVQ | DDSAGTGHS  | GSDHSGFIGS | MQAFIFNNNH | FFQMAKSGTG |
| C.elegansNRX  | SIYLNPIISV | EIDEVG.... | AAFSVHSSAP | PPRDEHFKGF | LSKLVFNQGD | YLAKTKMNSA |

|               |            |             |            |            |            |            |
|---------------|------------|-------------|------------|------------|------------|------------|
| DrosophilaNRX | ELSALPSATF | KLTA.R.FVNS | PAGQPYHAAT | FRSKHSYVGL | AMLKAYNSIS | IDFRFKTVEP |
| HumanNRX1     | DYCELN.... | .....ARFG   | FRNIIADPVT | FKTKSSYVAL | ATLQAYTSMH | LFFQFKTTSL |
| HumanNRX3     | DYCELK.... | .....ARFG   | LRNIIADPVT | FKTKSSYLSL | ATLQAYTSMH | LFFQFKTTSP |
| HumanNRX2     | TYCELN.... | .....ARFG   | LRAIVADPVT | FKSRSSYLAL | ATLQAYASMH | LFFQFKTTAP |
| AplysiaNRX    | DNIEIS.... | .....ARFSS  | DEYVVRDPVT | FKSVDFAIL  | PTLQAHEEFS | VSLQLKTES  |
| C.elegansNRX  | QLSKSSSRES | KGQ...RNVK  | TRIASISFTN | STGYVAFSSD | KISGLTGSFR | VQFKFQTLMR |

|               |             |            |            |            |            |            |
|---------------|-------------|------------|------------|------------|------------|------------|
| DrosophilaNRX | NGLLVFNG..  | GRRNDFVAVE | LVNGHIHYTF | DLGDG...PV | TMRDKSRIHM | NDNRWHQVSI |
| HumanNRX1     | DGLILYNS..  | GDGNDFIVVE | LVKGYLHYVF | DLGNG...AN | LIKGSNKPL  | NDNQWHNVMI |
| HumanNRX3     | DGFILFNS..  | GDGNDFIAVE | LVKGYIHYVF | DLGNG...PN | VIKGNDRPL  | NDNQWHNVVI |
| HumanNRX2     | DGLLLFNS..  | GDGNDFIVIE | LVKGYIHYVF | DLGNG...PS | LSKGNMFKPV | NDNQWHNVVV |
| AplysiaNRX    | DGLLILYNG.. | GNENDFFALE | LFQGFLLYVY | NMGE...AQ  | RVKANVQHPI | NDNKWHEARI |
| C.elegansNRX  | SALLFFTLPK  | HDYDQSFRLQ | MLNGRLKYTY | RTSGQEFHTT | SPKLPHRQHL | SDMRWHNVLI |

|               |            |            |            |            |            |             |
|---------------|------------|------------|------------|------------|------------|-------------|
| DrosophilaNRX | RRPGPKHTTL | TVDDSFEEIS | LTGNN..MHL | ELAGILYIGG | VFKDMYSKLP | ASISSRSRGE  |
| HumanNRX1     | SRDTSNLHTV | KIDTKITTQI | TAGA...RNL | DLKSDLYIGG | VAKETYKSLP | KLVHAKGEGFQ |
| HumanNRX3     | TRDNSNTHSL | KVDTKVVTQV | INGA...KNL | DLKGDLYMAG | LAQGMYSNLP | KLVASRDGFQ  |
| HumanNRX2     | SRDPGNVHTL | KIDSRVTQH  | SNGA...RNL | DLKGELYIGG | LSKNMFSNLP | KLVASRDGFQ  |
| AplysiaNRX    | FRVEKFTQLL | RVDDNTPTVD | DLTGTKNNRF | DLDGFLYIGG | VRKTMYPSP  | KLVYSRHGFV  |
| C.elegansNRX  | YQDEKTHDHV | LLVDNSSTTL | IIDKIKKVES | KMSGKLYFG. | .....SNPL  | GVSRSRNGFR  |

|               |            |            |            |             |              |            |
|---------------|------------|------------|------------|-------------|--------------|------------|
| DrosophilaNRX | GCLASLDLGD | ASPSLTSDAV | VPSSL..... | .....VVS    | GCEGPT....   | ....KCSQNA |
| HumanNRX1     | GCLASVDLNG | RLPDLISDAL | FCNGQ..... | .....IER    | GCEGPS....   | ...TTCQEDS |
| HumanNRX3     | GCLASVDLNG | RLPDLINDAL | HRSGQ..... | .....IER    | GCEGPS....   | ...TTCQEDS |
| HumanNRX2     | GCLASVDLNG | RLPDLIADAL | HRIGQ..... | .....VER    | GCDGPS....   | ...TTCTEES |
| AplysiaNRX    | GCLGSLNLNG | YLPNVLREAN | PIHES..... | .....VGD    | GCRGPM... .. | ....KCVNDS |
| C.elegansNRX  | GCISTLRINE | NALDLYEDAD | SRMKVNRGCS | VLTFLFELFQF | ECKLLNVYNS   | GPIARCIEDA |

|               |             |            |            |            |            |            |
|---------------|-------------|------------|------------|------------|------------|------------|
| DrosophilaNRX | CANRGNCVQQ  | WNAYACECDM | TSYTGPTCYD | ESIAIEFGNN | KGMVQYTFPE | NAQADTEEDN |
| HumanNRX1     | CSNQGVCLQQ  | WDGFSCDCSM | TSFSGPLCND | PGTTYIFSKG | GGQITYKWPP | NDRPSTRADR |
| HumanNRX3     | CANQGVCMQQ  | WEGFTCDSCM | TSYSGNQCND | PGATYIFGKS | GGLILYTWPA | NDRPSTRSDR |
| HumanNRX2     | CANQGVCLQQ  | WDGFTCDCTM | TSYGGPVCND | PGTTYIFGKG | GALITYTWPP | NDRPSTRMDR |
| AplysiaNRX    | CANQGRVCVQQ | WTSYKCCDCM | TSFTGPMCKD | ESVSYKFGPG | PGLMTFAHLA | DHEPSTNFDN |
| C.elegansNRX  | CANHGRCIQ   | WSSIRDCDSL | TAHSGDRCQN | PSTTVRFDGS | PSAIFYEYAP | NERPTTSKDY |

|               |            |            |            |            |            |            |
|---------------|------------|------------|------------|------------|------------|------------|
| DrosophilaNRX | IALGFITTRP | DAVLLRVESA | TQ.DYMELE  | IVEGNIFMVY | NIGSVLDPLG | EIGTKVNDNA |
| HumanNRX1     | LAIGFSTVQK | EAVLVRVDS  | SGLGDYLELH | IHQGKIGVKF | NVGTDDIAIE | ESNAIINDGK |
| HumanNRX3     | LAVGFSTTVK | DGILVRIDSA | PGLGDFLQLH | IEQGKIGVVF | NIGTVDISIK | ERTPVNDGK  |
| HumanNRX2     | LAVGFSTHOR | SAVLRVDSA  | SGLGDYLELH | IDQGTGVVIF | NVGTDDITID | EPNAIVSDGK |
| AplysiaNRX    | LAFGFKTFLS | DAILLRMDS. | RAYDDFIQIE | LADGYVYLVY | NMGSDHPLG  | DFYHKVNDGQ |
| C.elegansNRX  | FVFSFRTTQP | NGVLISIECA | ADQ.DYFTIF | LNKGYLNAHY | NLGNRDHTTS | YHTRILNDGF |

|               |            |            |            |            |            |            |
|---------------|------------|------------|------------|------------|------------|------------|
| DrosophilaNRX | YHVVRFRQK  | GNATLQLDDY | NVQALTPQS. | .....      | .....      | .....H     |
| HumanNRX1     | YHVVRFTRSG | GNATLQVDSW | PVIERYPAG. | .....      | .....      | .....R     |
| HumanNRX3     | YHVVRFTRNG | GNATLQVDNW | PVNEYPTG.  | .....      | .....      | .....R     |
| HumanNRX2     | YHVVRFTRSG | GNATLQVDSW | PVNEYYPAGN | FDNERLAIAR | QRIPYRLGRV | VDEWLLDKGR |
| AplysiaNRX    | YHVVRFTRAG | PNATLQIDAD | MPQTKHPTG. | .....      | .....      | .....K     |
| C.elegansNRX  | PHVIKISRTE | ANMTIQVDKL | PSLRYRPKR. | .....      | .....      | .....AS    |

|               |            |             |            |             |            |            |
|---------------|------------|-------------|------------|-------------|------------|------------|
| DrosophilaNRX | HSTVFNTMSN | VQVGGKFSRN  | GR.....    | ...NRIERPF  | AGVIAGLSVN | KLRILDLAVE |
| HumanNRX1     | QLTIFNSQAT | IIIGGKEQQG  | .....      | .....PF     | QGQLSGLYYN | GLKVLNMAAE |
| HumanNRX3     | QLTIFNTQAQ | IAIGGKDKGR  | .....      | .....LF     | QGQLSGLYYD | GLKVLNMAAE |
| HumanNRX2     | QLTIFNSQAA | IKIGGRDQGR  | .....      | .....PF     | QGQVSGLYYN | GLKVLALAAE |
| AplysiaNRX    | QAHTFNNQAF | VRIGGTKVEN  | .....      | ...GSITQHF  | EGIISGLVLN | GINVFEIAKH |
| C.elegansNRX  | DLVLLNMQTR | ISIGAAFNTR  | HLDQKRLLRH | RRNTEIFDSY  | QGEISGVNVN | GLMILDLYEN |
|               |            |             |            |             |            |            |
| DrosophilaNRX | RDPHITIRGD | VQLVTG....  | .....      | VLDRNDLQRM  | QQTPASGYPG | ALDDLIFSGA |
| HumanNRX1     | NDANIAIVGN | VRLVGEVPS   | .....      | SMTTES.TAT  | AMQSEMSTS  | .IMETTTTLA |
| HumanNRX3     | NNPNIKINGS | VRLVGEVP..  | .....      | SILGTT.QTT  | SMPPEMSTT  | .VMETTTTMA |
| HumanNRX2     | SDPNVRTEGH | LRLVGEGPS   | .....      | VLLSAETTAT  | TLLADMATT  | .IMETTTTMA |
| AplysiaNRX    | EDPKVRLEGS | VSLNQRPPQG  | PFRPPQLYTD | DEDLDEMQST  | QGHTTPRDGV | TDDDIQAGA  |
| C.elegansNRX  | GSNRIHTIGA | PQTTAVSEQV  | SSE.....SE | EDDELAEMMM  | AHSIDENPNE | ALIESLAPSC |
|               |            |             |            |             |            |            |
| DrosophilaNRX | GSGCRGDDED | ECTPPFESGS  | GDDLITPVYV | PPTKQTTTSQ  | QGNSLSTGGS | SSGGVITNGT |
| HumanNRX1     | TSTARRGKP  | PTKEPISQTT  | DDILVASAEC | PSDDE.....  | .....      | .....      |
| HumanNRX3     | TTTTRKNR.. | .STASIQPT   | SDDLVSAAEC | SSDDE.....  | .....      | .....      |
| HumanNRX2     | TTTTRRGRSP | TLRDSTTQNT  | DDLLVASAEC | PSDDE.....  | .....      | .....      |
| AplysiaNRX    | GSGCQFDNSE | DCSAVGSIGIE | EIITPVVIVK | TTTTPPPTTTP | KVPKQCQ... | .....      |
| C.elegansNRX  | LSLEEQQSCF | IDTDDSTGFF  | SPVLPTVANF | PTTRQTEHID  | N.....     | .....      |
|               |            |             |            |             |            |            |
| DrosophilaNRX | ERACDDEDCV | HGSG.....   | ....DYGETT | EQFTSTSTAR  | GSESNNEMVT | ITTTGRSDVT |
| HumanNRX1     | ...DIDPCE  | PSSG.....   | .....      | .....       | .....      | .....      |
| HumanNRX3     | ...DFVECE  | PSTA.....   | .....      | .....       | .....      | .....      |
| HumanNRX2     | ...DLEECE  | PSTGGELILP  | IITEDSLDPP | PVATRSPFVP  | PPPTFYFPLT | GVGATQDTLP |
| AplysiaNRX    | ...GEGCE   | TSSQLR....  | .....      | .....       | .....      | .....      |
| C.elegansNRX  | ...EVTALI  | TSSLAP....  | .....      | .....       | .....      | .....      |
|               |            |             |            |             |            |            |
| DrosophilaNRX | TEQHQSSSSS | SSSGSTPSYA  | TTQSSSSSSS | GGSAASTPGQ  | VSTTSSVATS | STQRATSSST |
| HumanNRX1     | .....      | .....       | .....      | .....       | .....      | .....      |
| HumanNRX3     | .....      | .....       | .....      | .....       | .....      | .....      |
| HumanNRX2     | PPAARRPPSG | GPCQAERDDS  | DCEEPIEASG | FASGEVFDSS  | LPPTDDEFY  | TTFPLVTDRT |
| AplysiaNRX    | .....      | ...QRPDPS   | LPSSTLSPSG | SGHDYGGDGG  | GNGDIDYVGG | SGEIEPTDNR |
| C.elegansNRX  | .....      | ...QKTRPKS  | TPHFTVYPVR | PTTPMGDTIT  | TTMQAATVTD | FPRTPLIMCS |
|               |            |             |            |             |            |            |
| DrosophilaNRX | STSSSTTSTT | TTTTTTQATP  | PPEIRSTVTE | RETPYDIYI   | AGGGMGGSGR | NHDRMQLPD  |
| HumanNRX1     | .....      | .....       | .....      | .....       | .....      | .....      |
| HumanNRX3     | .....      | .....       | .....      | .....       | .....      | .....      |
| HumanNRX2     | TLLSPRPAP  | RPNLRTDGAT  | GAPGVLFAPS | APAPNLPAGK  | MNHRDPLQPL | LENPPLGPGA |
| AplysiaNRX    | D.....     | .....       | .....      | .....       | .....      | .....      |
| C.elegansNRX  | .....      | .....       | .....      | .....       | .....      | .....      |
|               |            |             |            |             |            |            |
| DrosophilaNRX | EHHPLPPLPP | PIPPQDPPPY  | GPYGGNTYNT | NMNNYRPKGK  | GGRINSIEEE | RTAMIIGIVA |
| HumanNRX1     | .....      | .....       | ...GLANPT  | RAGGREPYPG  | SAEVIRESSS | TTGMVVGIVA |
| HumanNRX3     | .....      | .....       | ...NPTEPG  | ...IRRVPG   | ASEVIRESSS | TTGMVVGIVA |
| HumanNRX2     | PTSFEPRRPP | PLRPGVTSAP  | GFPHLPTANP | TGPGERGPPG  | AVEVIRESSS | TTGMVVGIVA |
| AplysiaNRX    | .....      | .....       | ...GYHGHF  | DKSTTKPGKT  | TDDDDDDGV  | NLVLILGITG |
| C.elegansNRX  | .....      | .....       | ...SLAVII  | AIAAVVFFVF  | KCRQNPPNSE | HYTMAMKQS  |
|               |            |             |            |             |            |            |
| DrosophilaNRX | GILIAVVLVI | LLVLWLKSNQ  | DRGYKTESEK | AAAYGSHNPN  | AALLGNTSTN | GSYHQQRQHH |
| HumanNRX1     | AAALCILILL | YAMYKYRNRD  | EGSYHVDESR | NYISNSAQSN  | GAVVKEKQPS | SAKSSN.... |
| HumanNRX3     | AAALCILILL | YAMYKYRNRD  | EGSYQVDETR | NYISNSAQSN  | GTLMKKEQ.Q | SSKSGH.... |
| HumanNRX2     | AAALCILILL | YAMYKYRNRD  | EGSYQVDQSR | NYISNSAQSN  | GAVVKEKAPA | APKTPS.... |
| AplysiaNRX    | SVLLAVIVLC | IVLCKLRGRD  | EGTYKVDETQ | NFSALQSKKS  | QNGGSLASGG | ESCTGK.... |
| C.elegansNRX  | GYTAIAPELS | PPMNHDRSND  | SCTQPLLAKP | HINGNGYEPL  | KGAVIANGNG | ATATMMRNGN |
|               |            |             |            |             |            |            |
| DrosophilaNRX | MHGGGGGGGA | GQQQHHAQQQ  | MHNGHNGNGN | GGGGGGGMM   | SSGSGSLGYG | SDGRPQMAGL |
| HumanNRX1     | .....      | .....       | .....      | .....       | .....      | .....      |
| HumanNRX3     | .....      | .....       | .....      | .....       | .....      | .....      |
| HumanNRX2     | .....      | .....       | .....      | .....       | .....      | .....      |
| AplysiaNRX    | .....      | .....       | .....      | .....       | .....      | .....      |
| C.elegansNRX  | GNG.....   | .....       | .....      | .....       | .....      | .....      |

|               |            |          |
|---------------|------------|----------|
| DrosophilaNRX | VQPKAKKRDS | KDVKEWYV |
| HumanNRX1     | .....KNKK  | NKDKEYYV |
| HumanNRX3     | .....KKQK  | NKDREYYV |
| HumanNRX2     | .....KAKK  | NKDKEYYV |
| AplysiaNRX    | .....RGKK  | KDVKEWYV |
| C.elegansNRX  | .....VAKK  | KDFKEWYV |

## E. ApNRX Alternative Splicing

|             |                                                               |     |
|-------------|---------------------------------------------------------------|-----|
| ApNRX       | MAVELFPFSPRHLQCLTLAVAIFAAILCRLPCAHTLNLDGSPGSYVEYPPWEPCLNGSFS  | 60  |
| Human NRX-1 | MGTALLQRGGCFLCLSLLLLGCWAELG-----SGLFFPGAEGQWTRFPKWNACCSEMS    | 55  |
| ApNRX       | FEFRTSEPLSLLLYLNRSYSYFEVKLLKGGIRLRMNLG---ERTMIIRAGQNLNDNKWH   | 117 |
| Human NRX-1 | FQLKTRSARGLVLYFDDEGFCDFLELILTRGGRLQLSFSIFCAEPATLLADTPVNDGAWH  | 115 |
| ApNRX       | SVEVVQDGDLTTLIVDGIHESKTSSGLLHTYNGLANETFLLYLGGLPMEYESKFKNSLALP | 177 |
| Human NRX-1 | SVRIRRQFRNTTLFIDQVEAKWVEVKSRRD--MTVFSGLFVGGLPPELRAAALK-LTLA   | 172 |
| ApNRX       | SVIFEKPKFRGSRVNFYR                                            | 230 |
| Human NRX-1 | SVREREFPKGIWIRDVRVNSSQVLPVDSGEVKLDDEPPNSGGGSPCEAGEEGEGVCLNGG  | 232 |
| ApNRX       | RCLTTDNGVLCDCCTATEYRGRDCDIQKIPSD-----ATFMGTQYF                | 270 |
| Human NRX-1 | VCSVVDDQAVCDCSRTRGFRGKDCSQEDNNVEGLAHLMMGDQGSK                 | 292 |
|             | 1                                                             |     |
| ApNRX       | SYNLSSRGDVMVDQDRVRLDFRTKQANSLLFYTGNSKDYMTVGLMDGAVFLTINLGSAMY  | 330 |
| Human NRX-1 | CYDLS-QNPIQSSSDEITLSFKTLQRNGLMLHTGKSADYVNLALKNGAVSLVINLGSQAF  | 351 |
|             | 1                                                             |     |
| ApNRX       | QAEIRPSGTRFDDNRWHQLLIQREARELPRDAGVCFVTMELDGMRYRKQGSITGKFIRLSS | 390 |
| Human NRX-1 | EALVEPVNGKFNNDNAWHDKVTRNLRQHS-GIGHAMVTISVDGILTTTGYTQEDYTMLGS  | 410 |
|             | 2                                                             |     |
| ApNRX       | N-LLYVAGSPNTEETLPGSRVRTNFKGCLRKVR                             | 449 |
| Human NRX-1 | DDFFYVGGSPSTADLPGSPVSNFMGCLKEVVYKNDVRLRLSRLAKQGDPKMIHG-VV     | 469 |
| ApNRX       | FDKCQELVESH                                                   | 508 |
| Human NRX-1 | AFKCENVATLDPITFETPESFISLPKWN-AKKTGSISFDFRTTEPNGLILFSGHGRHQK   | 528 |
| ApNRX       | -----DFFALELLDGHLYLVLDMGSGILKIQASKLPVSDGRPHDVYFEFKYGRGD       | 558 |
| Human NRX-1 | DAKHQMIKVDFFAIEMLDGHLYLLDMSGTIKIKALLKKVNDGEWYHVDFQRDGRSGT     | 588 |
| ApNRX       | ISVDGQKVPFASGRVSDRFDLHGFFYVGGGSEINASLLPRELWAVMLGLSYVGCLQDLV   | 618 |
| Human NRX-1 | ISVNTLRTPYTAPGESEILDLDDELYLGGLPENKAGLVFPTEVWTALLNYGYVGCIRDLF  | 648 |
| ApNRX       | LDGSKVDLLAAARLQNKSDVAG-YCKQTEPQCVSHPCNHGGKCEGWNRFSCDCRATGFV   | 677 |
| Human NRX-1 | IDGQSKDIRQMAEVQSTAGVKPSCSKETAKPCLSNPCKNNGMCRDGNWRYVDCSGTGYL   | 708 |
| ApNRX       | GAVCQTAAATLQFDGTQFMKVMTSRESVTAEDVSLRFRSLHPSGLLFLTGGN-----     | 731 |
| Human NRX-1 | GRSCEREATVLSYDGSFMFKIQLPVVMHTEAEDVSLRFRSQRAYGILMATTSRDSADTLR  | 768 |
| ApNRX       | ----DNRMQFLFQQGTLFLSVNVGSGSKVLSVGHRLNDDRWHVTFIRRRVQTVELAIDS   | 787 |
| Human NRX-1 | LELDAGRVKLTVNLDCIRINCNSKGPETLFAGYNLNDNEWHTVRVVRGKSLKLTVDQ     | 828 |
|             | 3                                                             |     |
| ApNRX       | RPVIDQLPGSTFSLATNYIFVGHKNPPGTEVADLPGRARELGLSSVEAGHMQD         | 847 |
| Human NRX-1 | QAMTGMAG-----DHTRELFHNIETGIITERR-----                         | 856 |
|             | 2                                                             |     |
| ApNRX       | GHSQSDHSGFIGSMQAFIFNNNHFFQMAKSGTGDNIEISARFSSDEYVVRD           | 907 |
| Human NRX-1 | -YLSVPSNFIGHLQSLTFNGMAYIDLCKNGDIDYCELNARFG-FRNIAD             | 914 |
| ApNRX       | FAILPTLQAHEEFSVSLQKTTESDGLILYNGGNENDDFALELFQGFLLYYVNMGEQAQR   | 967 |
| Human NRX-1 | YVALATLQAYTSMHLFFQFKTSLDGLILYNSGDGNDFIVVELVKGYLHYVFDLNGANL    | 974 |

|             |                                                               |      |
|-------------|---------------------------------------------------------------|------|
| ApNRX       | VKANVQHPINDNKWHEARIFRVEKFTQLLRVDDNTPTVDDLGTGKNNRFDLDGFLYIGGV  | 1027 |
| Human NRX-1 | IKGSSNKPLNDNQWHNVMSRDTSNLHTVKIDTKITTQITAG---ARNLDLKSPLYIGGV   | 1031 |
| ApNRX       | RKTMYPSPKLVYSRHGFVGCGLSLNLYLPNVLREANPIHESVGDGCRGPMKCVNDS      | 1087 |
| Human NRX-1 | AKETYKSLPKLVHAKGEGFQGCLASVDLNGRLPDLISDALFCNGQIERGCEGPSTTCQEDS | 1091 |
| ApNRX       | CANQGRVCVQQWTSYKDCDMTSFTGPMCKDESVSYKFGPGPG                    | 1147 |
| Human NRX-1 | CSNQGVCLQQWDGFSCDCSMTSFSGLPCNDPGTTYIFSKGGG                    | 1151 |
| ApNRX       | LAFGFKTFLSDAILLRMSR-AYDDFIQIELADGYVYLVYNMGSFDHPLGDFYHKVNDGQ   | 1206 |
| Human NRX-1 | LAIGFSTVQKEAVLVRVDSSSGLGDYLELHIHQKIGVKFNVTDDIAIEESNAIINDGK    | 1211 |
| ApNRX       | YHVVRFTRAGPNATLQIDADMPQTKHPTGKQAHTFNNQAFVRIGGTKVENGSITQHFEGI  | 1266 |
| Human NRX-1 | YHVVRFTRSGGNATLQVDSWPVIERYPAGRQLTIFNSQATIIIGGKEQG-----QPFGQ   | 1266 |
| ApNRX       | ISGLVLN                                                       | 1326 |
| Human NRX-1 | LSGLYYN                                                       | 1298 |
| ApNRX       | TTPRDGVTDDDI IQAGAGSGCQFDNSEDCSAVSGIEEII TPVVIKTTTTPPPTTTPKPV | 1386 |
| Human NRX-1 | -----EVPSSMTTESTATAMQSEMSTS IMETTTTLLATSTARRGK                | 1337 |
| ApNRX       | PKCQEGECETSSQLRQRPDPSLPSSLTSPSGSGHDYGGDGGNGDIDYVGGSGEIEPTDN   | 1446 |
| Human NRX-1 | P-----PTKEPISQTTDDILVASAECPSD-----DEDIDPEPSSGGIANPT           | 1379 |
| ApNRX       | RDGYHGHFDKSTTKPGKTTDDDDDDGVDN                                 | 1506 |
| Human NRX-1 | RAGGREPYPGSAEVIRESST                                          | 1431 |
| ApNRX       | TYKVDETQNFSAIQSKKSQGNGLASGGESCTGKRGKK                         | 1552 |
| Human NRX-1 | SYHVDESRNYISNSAQSNQAVVKEKQPSSAKSSNKNKK                        | 1477 |

3

4

TM

5

PDZ



**Figure S2. Characterization of ApNRX and ApNLG Antibodies, Related to Figure 1 and 2**

(A) HEK293 cells were transfected with VSV-G tagged ApNRX or mock transfected and cell lysates were immunoblotted with anti-VSV-G and anti-ApNRX antibody. Both antibodies detected the same band near 170 kDa (marked with an arrow) corresponding well to the expected size of the VSV-G-ApNRX fusion protein (172 kDa).

(B) *Aplysia* total CNS extract was immunoblotted with the anti-ApNRX antibody, or with the same antibody pre-absorbed with the immunizing peptide as a specific competitor. The anti-ApNRX antibody detected two major high molecular weight bands at 170 and 220 kDa and an additional lower molecular band around 60 kDa (marked with arrows). All of these bands were eliminated by pre-absorption with the specific competitor peptide. The sizes of the high molecular weight bands correspond well to the expected size distribution of the ApNRX isoforms we have detected by RT-PCR (170-220 kDa) and the size of known mammalian and invertebrate  $\alpha$ -neurexins. The 60 kDa lower molecular weight band is similar in size to mammalian  $\beta$ -neurexins. Although we have not detected transcripts corresponding to  $\beta$ -neurexins in *Aplysia*, we cannot rule out the possibility that they exist because the *Aplysia* genome is not yet fully sequenced. However, since other invertebrates also lack  $\beta$ -neurexins (Tabuchi and Südhof, 2002), it seems more likely that this band represents a truncated protein generated by a specific proteolytic cleavage which could have similar structure and function as mammalian  $\beta$ -neurexins. The anti-ApNRX antibody also detected

a weaker band at 140 kDa (marked with a bar) that was not efficiently competed and therefore most likely represents a cross reactive protein present in the *Aplysia* CNS extract.

(C) HEK293 cells were transfected with GFP tagged ApNLG or mock transfected and cell lysates were immunoblotted with anti-GFP and anti-ApNLG antibody.

Both antibodies detected the same band at 110 kDa (marked by an arrow) matching the expected size of the GFP-ApNLG fusion protein (110 kDa). The anti- ApNLG antibody also displayed strong cross-reactivity with several proteins in the 55-65 kDa range in the HEK extract whose identity is unknown.

(D) *Aplysia* total CNS extract was immunoblotted with the anti-ApNLG antibody with or without pre-absorption of the antibody with the recombinant ApNLG protein used for immunization as a specific competitor. The anti-ApNLG antibody detected two major bands at 85 and 120 kDa. The 85 kDa band (marked by an arrow) matches the predicted size of ApNLG (85 kDa) and was efficiently and specifically competed by pre-absorption with ApNLG. The 120 kDa band (marked with a bar) could be due to non-specific cross-reactivity since it was not competed as efficiently by pre-absorption with ApNLG.

**A**VSV-G-  
ApNRX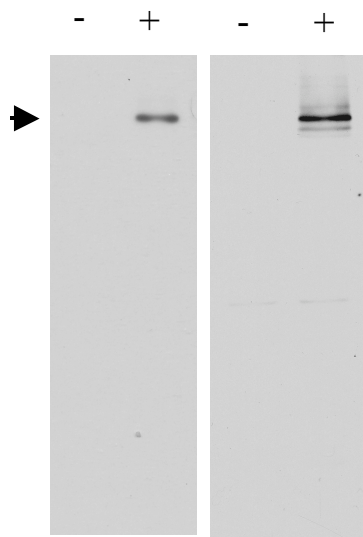**B**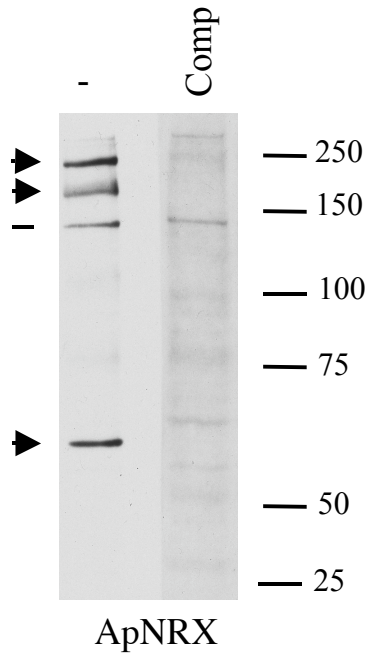**C**

GFP-ApNLG

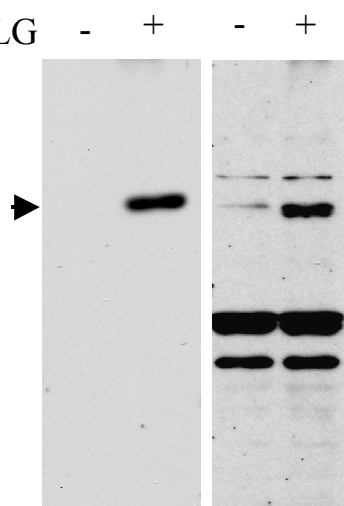**D**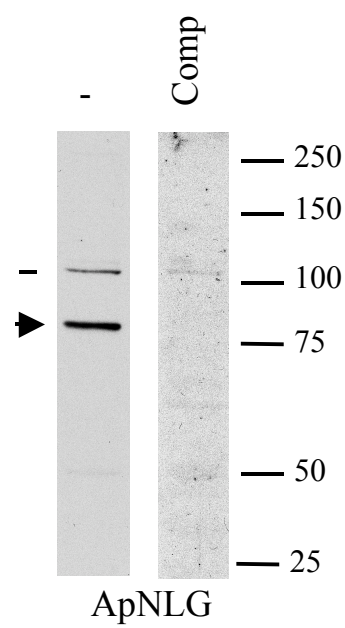

### **Figure S3. Characterization of ApNRX and ApNLG Antisense**

#### **Oligonucleotides, Related to Figure 5 and Figure 6**

Antisense oligonucleotides were microinjected (50  $\mu\text{g/ml}$ ) into *Aplysia* neurons.

Neurons were fixed 3 hrs or 12 hrs after injections and immunostained with

ApNRX or ApNLG antibodies. (A) Confocal projection images of the initial segment of sensory neurons that were injected with antisense oligonucleotides against ApNRX or uninjected controls. Scale bar 5  $\mu\text{m}$ .

(B) Confocal projection images of the initial segment of motor neurons that were injected with antisense oligonucleotides against ApNLG or uninjected controls. Scale bar 10  $\mu\text{m}$ .

Summary bar graphs of the average fluorescence intensities of (C) sensory neuron initial segment for ApNRX (at 3 hours after injection: uninjected control  $100 \pm 8.2\%$ ,  $n = 8$ , sense  $96.1 \pm 11.2\%$ ,  $n = 9$ , antisense  $46.3 \pm 2.1\%$ ,  $n = 26$ ,  $p < 0.001$  vs. control and sense, at 12 hours after injection: uninjected control  $100 \pm 8.7\%$ ,  $n = 12$ , sense  $92.7 \pm 6.5\%$ ,  $n = 13$ , antisense  $38.3 \pm 3.5\%$ ,  $n = 14$ ,  $p < 0.001$  vs. control and sense) and (D) motor neuron initial segment for ApNLG (at 3 hours after injection: uninjected control  $100 \pm 10.1\%$ ,  $n = 4$ , sense  $94.7 \pm 4.2\%$ ,  $n = 3$ , antisense  $68.7 \pm 1.9\%$ ,  $n = 5$ ,  $p < 0.05$  vs. control and sense, at 12 hours after injection: uninjected control  $100 \pm 1.8\%$ ,  $n = 13$ , sense  $99.2 \pm 3.2\%$ ,  $n = 15$ , antisense  $67.1 \pm 2.3\%$ ,  $n = 22$ ,  $p < 0.001$  vs. control and sense).

The error bars represent SEM.

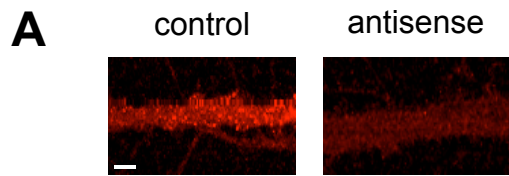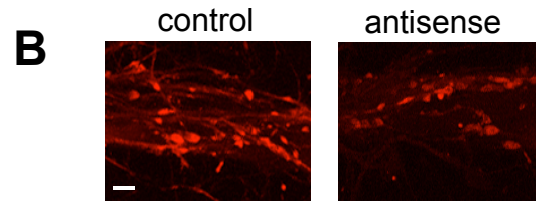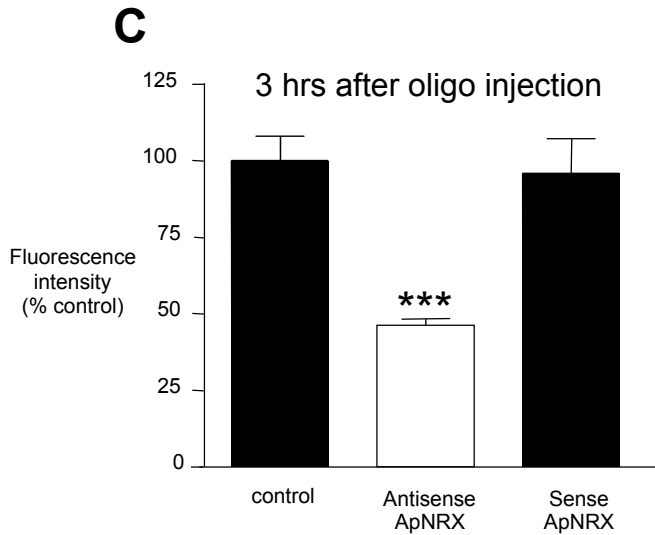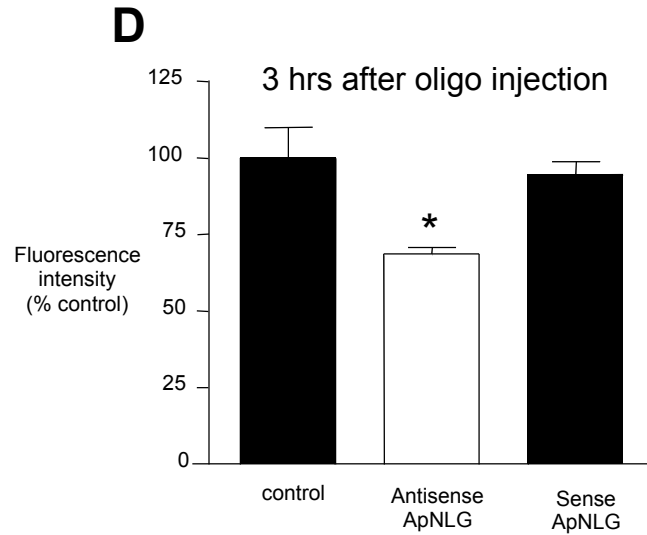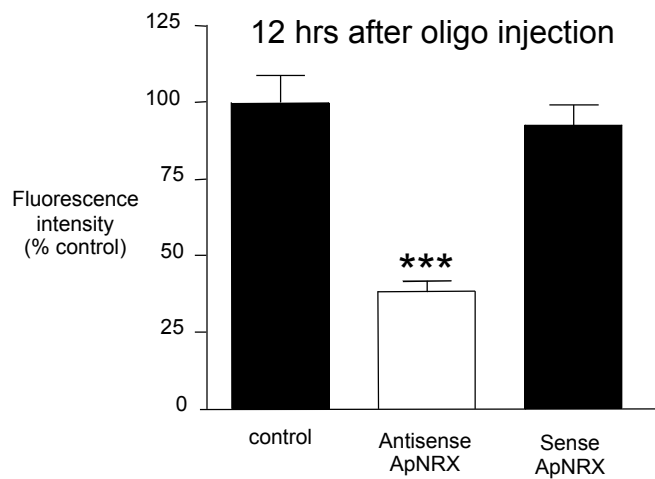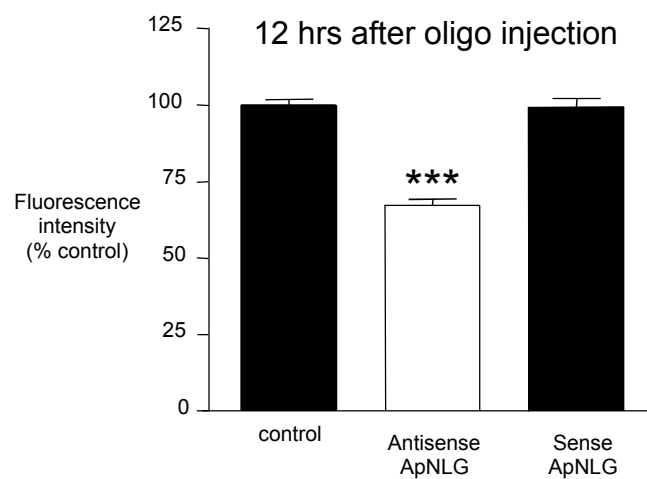

**Table S1. ApNRX splice site variants and insert sequences, Related to Figure 2.**

| ApNRX splice site | Equivalent vertebrate NRX splice site | Variants at each site | Insert sequence(s)                                                                                                                                                                                                                                                                                                                                                                                                                                                                                                                                                                                                                                                                                                                                                                                                                                                                                                                                                                                                              |
|-------------------|---------------------------------------|-----------------------|---------------------------------------------------------------------------------------------------------------------------------------------------------------------------------------------------------------------------------------------------------------------------------------------------------------------------------------------------------------------------------------------------------------------------------------------------------------------------------------------------------------------------------------------------------------------------------------------------------------------------------------------------------------------------------------------------------------------------------------------------------------------------------------------------------------------------------------------------------------------------------------------------------------------------------------------------------------------------------------------------------------------------------|
| 1                 | 2                                     | 2                     | LPRDAGVCF                                                                                                                                                                                                                                                                                                                                                                                                                                                                                                                                                                                                                                                                                                                                                                                                                                                                                                                                                                                                                       |
| 2                 | 3                                     | 2                     | GHKNPPGTEVADLPGRARELGLSSVEA                                                                                                                                                                                                                                                                                                                                                                                                                                                                                                                                                                                                                                                                                                                                                                                                                                                                                                                                                                                                     |
| 3                 | 4                                     | 2                     | SFHSMKRNILLCDRK                                                                                                                                                                                                                                                                                                                                                                                                                                                                                                                                                                                                                                                                                                                                                                                                                                                                                                                                                                                                                 |
| 4                 | 5                                     | 3                     | <p><b>Insert 1:</b> RGNPMSPALRRHLLWKS GKIKHHFQMRNSRAKGRRDVRGLRRNGSKHTGVK<br/>TPMATKWKPGVKAEEKWRRFTVLEPHRRKYETA;</p> <p><b>Insert 2:</b> RGNPMSPALRRHLLWKS GKIKHHFQMRNSRAKGRRDVRGLRRNGSKHTGVK<br/>TPMATKWKPGVKAEEKWRRFTVLEPHRRKYETA VSGAKERRTENVVRETLKEKQEN<br/>EVKSMGTYPQYRKDKTSNRVGGYETTKNEDRPWVKNHRSPEFELNHAQQEVHNRTL<br/>YIYAPVDKKESSASVRRESNELDASDNDWEDMNSMVKTDFGVIMQPNKPKVRPTPAH<br/>QCDYGGPSNLKATAGPAMRGPEKHQKGFQQTYSSSRTEESSGIQTHFEHLRGPEPD<br/>FGDVIDENA VDNAEYDDIFGVTD RSFAYDSRRVKERQEGLRGRGNTGEDYEHFEETIV<br/>KLNELMRSLRVNGDDEDEDEVPEGSGFETVDGEDPSSANDRENLTRWSAHYRQSSEQ<br/>TSTIVIPYQTM TSEQPFHLGETSSSSXTLRGAARSYFASETAVSGAKERRTENVVRETLK<br/>EKQENEVKSMTYPQYRKDKTSNRVGGYETTKNEDRPWVKNHRSPEFELNHAQQEV<br/>HNRTLYIYAPVDKKESSASVRRESNELDASDNDWEDMNSMVKTDFGVIMQPNKPKVR<br/>PTPAHQCDYGGPSNLKATAGPAMRGPEKHQKGFQQTYSSSRTEESSGIQTHFEHLRG<br/>PEPDFGDVIDENA VDNAEYDDIFGVTD RSFAYDSRRVKERQEGLRGRGNTGEDYEHFE<br/>ETIVKLNELMRSLRVNGDDEDEDEVPEGSGFETVDGEDPSSANDRENLTRWSAHYRQS<br/>SEQTSTIVIPYQTM TSEQPFHLGETSSSSXTLRGAARSYFAS</p> |

ApNRX splice sites 1, 2 and 3 either have or lack a single relatively short insert.

ApNRX splice site 4 can have two longer inserts: insert 1 (85 amino acids) and a much longer insert 2 (783 amino acids). Insert 2 is made up of the first insert sequence plus an additional 699 amino acids portion. The functional significance of such long inserts occurring at this site is unclear. However, their presence is confirmed by both long distance RT-PCR amplification with primers flanking the

start and stop codon yielding distinct amplification products with the respective ORFs and on the protein level by the ApNRX antibody recognizing bands of the appropriate size – 170 and 220 kDa for the site 4 insert negative and positive isoforms respectively (Figure S2).

## Supplemental Experimental Procedures

### Cloning and DNA constructs

ApNLG cloning: We used consensus-degenerate hybrid oligonucleotide primers (CODEHOPs – (<http://blocks.fhcrc.org/codehop.html>), Rose et al., 2003) approach to clone ApNLG. CODEHOP primers that were used to clone an initial 150 bp fragment of ApNLG from *Aplysia* genomic DNA are CACCCACTTCCCTCCCGYNTGYCCNCA and GGGCACGTAGATGTTTCAGGTA NARRCARTCYTC. We used this fragment to screen an *Aplysia* CNS cDNA library using 32P labeled probes to isolate a clone contained 5' UTR and approximately 75% of the ApNLG coding sequence. The 3' end of ApNLG coding sequence was cloned by multiple rounds of 3' RACE-PCR using a GeneRacer RACE ready cDNA kit (Invitrogen, CA).

ApNRX cloning: A 1KB EST sequence from the *Aplysia* EST database at the Columbia University Genome Center (<http://aplysia.cu-genome.org>) with similarity to a region in the extracellular portion of mammalian neurexin was extended in both directions by multiple rounds of 5' and 3' RACE-PCR employing a SMART Race cDNA amplification kit (Clontech/Takara, CA) to obtain the full length ApNRX gene including 5' and 3' UTRs. The full length 4659 base pair ApNRX open reading frame was amplified from *Aplysia* CNS cDNA with the following primers: Forward-ATGGCTGTGGAACTCTTCCCATTCTCGCCTAG; Reverse-TCACACATACCACTCCTTCACATCTTTCTTCTTGCCT using a touch down PCR protocol with the following parameters: 5 cycles: 94° C 30 sec, 72° C 5 min; 5 cycles: 94° C 30 sec, 70° C 30 sec, 72° C 5 min; 30 cycles: 94° C 30



sec, 68° C 30 sec, 72° C 5 min followed by 10 min extension at 72° C. The sequences of ApNLG and ApNRX were deposited into GenBank (accession number: HM448446 for ApNLG and HM461999 for ApNRX). All experiments in this study except for the ones in Figure 3 employed the most abundant ApNRX isoform which lacks inserts at sites 3 and 4 and has inserts at site 1 and 2 (Figure S1E). The ApNRX isoform used in the experiments in Figure 3 lacks inserts at site 1 in addition to sites 3 and 4 and contains the following amino acid substitutions likely resulting from single nucleotide polymorphisms: L207F, T411A and E438V.

ApNLG arginine to cysteine point mutation was generated using QuikChange site-directed mutagenesis kit (Stratagene, CA). GFP-ApNLG and HA-ApNLG were created by inserting GFP or HA peptide sequence into an engineered SmaI site after the 5<sup>th</sup> amino acid residue from the end of the putative signal peptide. GFP-ApNRX and VSV-G-ApNRX were created by inserting GFP or VSV-G peptide sequence into an engineered EcoRV site after the 3<sup>rd</sup> amino acid residue from the end of the putative signal peptide. ApNRX-GFP was constructed by amplifying the full length ApNRX excluding the stop codon with primers containing SbfI and XhoI cut site 5' extensions. It was then digested with SbfI and XhoI and ligated in frame with the GFP open reading frame in a pNEX3-GFP expression plasmid linearized with the same two enzymes. ApNRX C-terminal deletion was generated by amplifying the N-terminal 1509 amino acid portion of ApNRX, which deletes C-terminal 44 amino acids, and then ligating it in pNEX3-GFP in the same fashion as described above. All constructs were

verified by sequencing. We subcloned all DNA constructs into the *Aplysia* expression vector pNEX3.

### **Antibody production and Immunoblotting**

Rabbit polyclonal antibodies were raised against a synthetic peptide derived from the intracellular cytoplasmic tail of ApNRX [CKLRGRDEGTYKVDETQ] (Covance) and against the extracellular domain of ApNLG recombinantly expressed and purified from *E.Coli* and encompassing the first 615 N-terminal amino acids of the protein. N-terminal cysteine was added to the ApNRX peptide for coupling to KLH and injecting in rabbits. All antibodies were affinity purified onto columns conjugated with the corresponding immunizing peptide or recombinant protein. *Aplysia* proteins were isolated from sensory clusters or pleural ganglia using lysis buffer (50 mM Tris, pH 7.6, 525 mM NaCl, 1 mM EDTA) supplemented with protease inhibitor cocktail (Roche, Basel, Switzerland) and phosphatase inhibitors (Calbiochem, Darmstadt, Germany). Protein concentration was determined using a BCA kit (Pierce, Rockford, IL). 5-10 µg of protein were used for immunoblotting. ApNRX and ApNLG antibodies were used at 1:3000 dilution for immunoblotting.

### **Immunocytochemistry of *Aplysia* Neurons**

We fixed *Aplysia* cultures in 4% paraformaldehyde in PBS at room temperature (RT) for 20 min and then permeabilized in 0.1% Triton X-100 in PBS for 10 min at RT. Free aldehydes were quenched in 50 mM ammonium chloride in PBS for 10

min at RT. After blocking nonspecific antibody binding with incubation in 10% goat serum, we incubated cultures with primary antibody overnight at 4°C followed by incubation with secondary antibody for 1 hr at RT. ApNRX and ApNLG antibodies were used at 1:100 dilution for immunocytochemistry. The secondary antibody was goat anti-rabbit IgG Alexa 568-conjugate (Invitrogen-Molecular Probes, CA) at 1:200 dilution. For immunocytochemistry involving both ApNRX and ApNLG antibodies, we first immunostained cultures with ApNLG antibody, then fixed the cultures again before they were immunostained with ApNRX antibody conjugated to Alexa 488 using Zenon® Rabbit IgG Labeling Kit (Invitrogen-Molecular Probes, CA) at 1:25 dilution.

### **Construction of HA-ApNLG-Fc and VSV-ApNRX-Fc fusion constructs**

For HA-ApNLG-Fc, the HA-tagged extracellular domain of ApNLG (amino acid 1 to 641) was fused with the Fc portion of IgG2A at its C-terminus using the pFuse-mIgG2A-Fc vector (InvivoGen, CA). For VSV-G-ApNRX-Fc, the VSV-G-tagged ApNRX (amino acid 1 to 1457) was fused with the pFuse-mIgG2A-Fc vector. The Fc fusion constructs were transfected into HEK293 cells and the supernatants were harvested at 4 days after transfection. From each T75 flask, 10 ml of supernatants were collected and incubated with 50 % of ammonium sulfate to precipitate the Fc fusion proteins at 4<sup>0</sup> C for at least 4 hours. The precipitates were spun down by centrifugation and resuspended in 300 µl of PBS followed by overnight dialysis against PBS. The PBS equilibrated Fc fusion proteins were used for the binding assays.

## **Binding Assays**

Two days after transfecting HEK293 cells with GFP, GFP-ApNLG or GFP-ApNRX, cells were lysed with ice cold lysis buffer (1 mM phenylmethylsulfonyl fluoride, 100 µg/ml soy bean trypsin inhibitor, 20 µg/ml aprotinin, 100 µg/ml leupeptin, 1% Nonidet P-40 and 0.1% deoxycholate in PBS). Insoluble materials were removed from cell lysates by centrifugation at 12,000 rpm for 10 min.

Subsequently, the equal amount of lysates (200 µg) from GFP-ApNLG or GFP-ApNRX transfected cells were incubated with 15 µl of VSV-G-ApNRX-Fc or HA-ApNLG-Fc at 4<sup>0</sup> C overnight. In each condition, GFP transfected cell lysates were used as a control. Protein A agarose (15 µl) were added for an additional 3 hours next day. The precipitates were washed 3 times with lysis buffer followed by once with PBS and then subjected to get electrophoresis. The initial lysates and the subsequent precipitates of GFP-ApNLG and GFP-ApNRX in each binding condition were detected using rabbit anti-GFP antibody (Invitrogen, CA). The inputs of HA-ApNLG-Fc and VSV-G-ApNRX-Fc in the binding assays were detected using mouse monoclonal anti-HA 16B12 (Covance, CA) and anti-VSV-G antibody P5D4 (Sigma, MO), respectively.

## **Induction and Electrophysiological Assessment of LTF, Intermediate-Term Facilitation and STF in Sensory Neuron-Motor Neuron Co-Cultures**

We prepared *Aplysia* sensory-to-motor neuron co-cultures and measured excitatory postsynaptic potentials (EPSPs) as previously described (Montarolo et

al., 1986). We evoked the EPSP in L7 motor neuron by stimulating the sensory neuron with a brief depolarizing stimulus using an extracellular electrode. The motor neuron was held at a potential of  $-30$  mV below its resting potential to prevent eliciting action potentials. The synapses with initial EPSPs less than 4 mV were not used for analysis. To induce LTF, we treated cultures with five 5 min pulses of 5-HT ( $10 \mu\text{M}$ ) at 20 min intervals. Then, the cultures were maintained at  $18^\circ\text{C}$  and the EPSPs were again measured 24 hrs, 48 hrs, and 72 hrs after the initial EPSP measurement. For intermediate term facilitation, EPSPs were measured again 1 hr after the conclusion of 5-HT treatment. To induce STF, we treated cultures with one 5 min pulse of 5-HT ( $10 \mu\text{M}$ ) after the initial EPSP measurement. EPSP was measured again 5 min after 5-HT treatment.

### **Microinjection**

We dissolved the various DNA constructs ( $1 \mu\text{g}/\mu\text{l}$ ), oligonucleotides, or Alexa Dextran-594 (Invitrogen-Molecular Probes, CA) in a buffer containing 0.1% fast green, 10 mM Tris-Cl (pH 7.3), and 250 mM KCl. They were injected under visual guidance into the cytoplasm (for oligonucleotides or dyes) or into the nucleus (for DNAs) of *Aplysia* neurons by applying positive air pressure through Picospritzer II (General Valve Co., NJ).

The following oligonucleotides were used:

ApNLG antisense oligonucleotides: GACCAGCTCCGGAATATAACG

ApNLG sense oligonucleotides: CTGGTCGAGGCCTTATATTGC

ApNRX antisense oligonucleotides: CTTGGACTGAAGCGCTGAGAAGTT

ApNRX sense oligonucleotides: AACTTCTCAGCGCTTCAGTCCAAG

## **Cell Imaging and Quantification of the Structural Changes that Accompany 5-HT-Induced LTF**

We acquired images of *Aplysia* neurons using a Zeiss LSM 5 Pascal laser confocal scanning microscopes. Images were taken with a 40x, NA 1.3 objective, and the gains were adjusted to prevent saturation of the detection threshold. A z-series consisting of 30-50 optical sections were collected throughout the entire volume of the sensory neuron varicosities and maximum projections made off-line for analysis with Metamorph (University Imaging Corp, PA). We assessed the long-term structural changes by comparing the images of each sensory neuron before and 24 hr after 5-HT treatment. We identified sensory neuron varicosities as all labeled, elongated spheres (3  $\mu\text{m}$  or more in diameter) in apposition to the initial segment and major neurites of L7 motor neurons. (Bailey and Chen, 1983; Glanzman et al., 1990). The mean pixel intensities of GFP were determined by manually outlining the varicosities fluorescently labeled with Alexa Dextran-594. The maximum mean intensity among all the varicosities in one culture was designated as 100% enrichment index of GFP and the background intensity was designated as 0% enrichment index. The varicosities were binned according to their average fluorescence intensities. We considered varicosities in 0%-10% enrichment index to be “empty varicosities.” Quantitative analysis followed a blind procedure.

## Supplemental References

Bailey, C.H., and Chen, M. (1983). Morphological basis of long-term habituation and sensitization in *Aplysia*. *Science* 220, 91–93.

Missler, M., Fernandez-Chacon, R., and Südhof, T.C. (1998). The making of neurexins. *J. Neurochem.* 71,1339-1347.

Tamura, K., Dudley, J., Nei, M., and Kumar, S. (2007). MEGA4: Molecular Evolutionary Genetics Analysis (MEGA) software version 4.0. *Mol. Biol. Evol.* 24, 1596-1599.
